# Supplementary material for: First in situ vesicular self-assembly of ‘binols’ generated by a two-component aerobic oxidation reaction
Source: PubMed Central journal article supplement — RSC Adv. 2018 Aug 16;8(51):29155–63. doi: 10.1039/c8ra06488a (PMC9084448; doi:10.1039/c8ra06488a), 2018-08-16

## Supporting Information

### First *in situ* vesicular self-assembly of 'binols' generated by two-component aerobic oxidation reaction

Braja G. Bag,\* Subrata Ghorai, Saikat K. Panja, Shaishab K. Dinda, Koushik Paul  
Department of Chemistry and Chemical Technology  
Vidyasagar University  
Midnapore 721102, WB, India  
E-mail: [brajagb@gmail.com](mailto:brajagb@gmail.com)

| Sl. No. | CONTENTS                                                                                          | Page No. |
|---------|---------------------------------------------------------------------------------------------------|----------|
| 1       | Model schematic representation of self-replication                                                | 2        |
| 2       | Gelation property study and Thermodynamic parameter calculation                                   | 3-4      |
| 3       | Morphology analysis of self- assemblies by SEM , AFM, TEM                                         | 5        |
| 4       | Histogram of the size of vesicles from Optical Microscopy                                         | 6        |
| 5       | Low angle X-ray diffraction of self-assemblies                                                    | 7        |
| 6       | Dynamic Light Scattering                                                                          | 8        |
| 7       | Fluorescence emission spectra                                                                     | 9        |
| 8       | HPLC profiles for the oxidative coupling of <b>1b</b> to <b>2b</b>                                | 10       |
| 9       | <sup>1</sup> H-NMR, <sup>13</sup> C- NMR, DEPT- 90, DEPT -135, HRMS spectra of compound <b>2d</b> | 11-13    |
| 10      | <sup>1</sup> H-NMR, <sup>13</sup> C- NMR, DEPT- 90, DEPT -135, HRMS spectra of compound <b>2c</b> | 14-16    |
| 11      | <sup>1</sup> H-NMR, <sup>13</sup> C- NMR, DEPT- 90, DEPT -135, HRMS spectra of compound <b>2b</b> | 17-19    |
| 12      | <sup>1</sup> H-NMR, <sup>13</sup> C- NMR, DEPT- 90, DEPT -135, HRMS spectra of compound <b>2a</b> | 20-22    |
| 13      | <sup>1</sup> H-NMR, <sup>13</sup> C- NMR , HRMS spectra of compound <b>1d</b>                     | 23-24    |
| 14      | <sup>1</sup> H-NMR, <sup>13</sup> C- NMR, DEPT- 90, DEPT -135, HRMS spectra of compound <b>1c</b> | 25-27    |
| 15      | <sup>1</sup> H-NMR, <sup>13</sup> C- NMR, DEPT- 90, DEPT -135, HRMS spectra of compound <b>1b</b> | 28-30    |
| 16      | <sup>1</sup> H-NMR, <sup>13</sup> C- NMR, DEPT- 90, DEPT -135, HRMS spectra of compound <b>1a</b> | 31-33    |
| 17      | <sup>1</sup> H-NMR, <sup>13</sup> C- NMR, DEPT- 90, DEPT -135, HRMS spectra of compound <b>6</b>  | 34-36    |
| 18      | <sup>1</sup> H-NMR, <sup>13</sup> C- NMR, DEPT- 90, DEPT -135, HRMS spectra of compound <b>3</b>  | 37-39    |

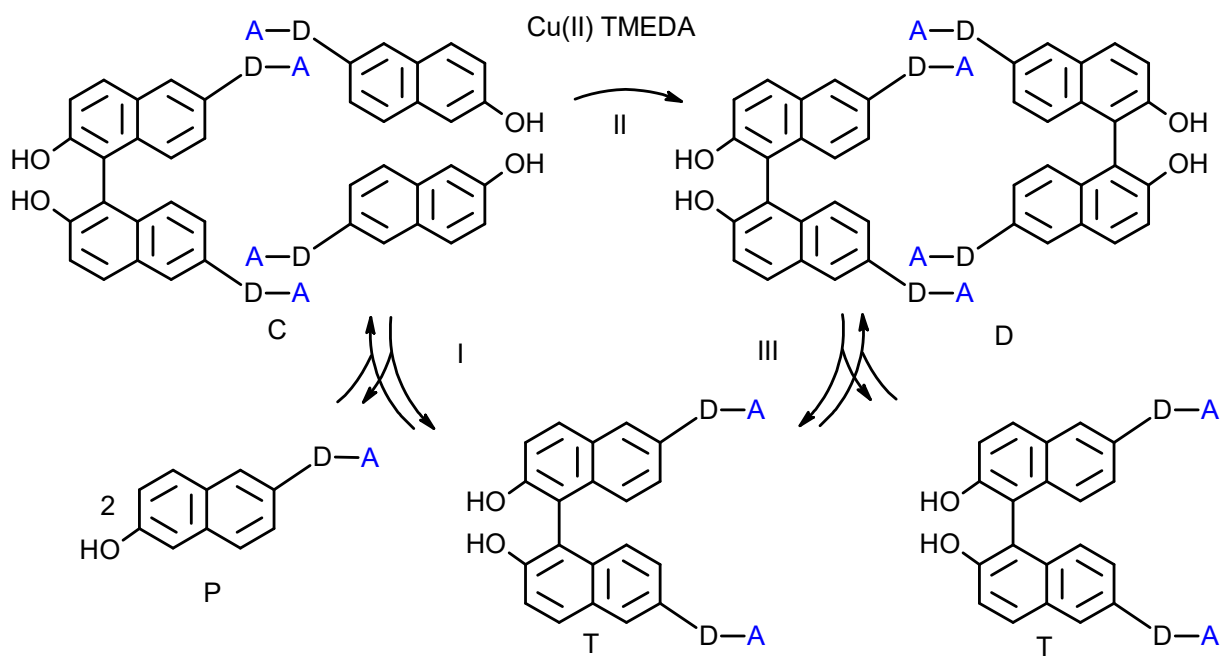

**Scheme S1:** Model schematic representation of self-replication of binols where the D:::A represents donor-acceptor noncovalent interactions

### Study of Gelation Property:

The compounds (**2b-d**) attached with long alkyl chain to binol system are excellent gelator for the mixed solvents basically in alkane solvents; here very little amount of chloroform is used only to solubilize i.e. to make a super saturated solution during gel formation. A survey of CGC values show that compound **2d** is the best gelator among all.

### Gelation Study in Cyclohexane/Chloroform (6:1 V/V):

All the gels were thermo-reversible in nature. Hence the gel to sol transition temperature  $T_{gel}$  were plotted against the gelator concentration (mM). With increase in the concentration of the gelator the  $T_{gel}$  increased indicating stronger intermolecular interactions and increased branching at higher concentrations.

| Entry | Conc. (%w/v) | $T_{gel}$ ( $^{\circ}$ C) of compound <b>2b</b> | $T_{gel}$ ( $^{\circ}$ C) of compound <b>2c</b> | $T_{gel}$ ( $^{\circ}$ C) of compound <b>2d</b> |
|-------|--------------|-------------------------------------------------|-------------------------------------------------|-------------------------------------------------|
| 1     | 0.833        | 54                                              | 55                                              | 58                                              |
| 2     | 1.00         | 58                                              | 60                                              | 65                                              |
| 3     | 1.25         | 63                                              | 65                                              | 70                                              |
| 4     | 1.66         | 70                                              | 73                                              | 74                                              |
| 5     | 2.5          | 77                                              | 80                                              | 84                                              |

### Thermodynamic parameters Calculation:

Various thermodynamic parameters ( $\Delta H^{\circ}$ ,  $\Delta S^{\circ}$  and  $\Delta G^{\circ}$ ) during gel to sol phase transitions were calculated from the variation of  $T_{gel}$  with concentrations. The positive free energy changes ( $\Delta G^{\circ}$  values) obtained in both of the cases studied during gel to sol transition indicated the stability of the gels. The free energy changes during gel to sol transition of compound **2b-d** in cyclohexane/ $\text{CHCl}_3$  (6:1 v/v) were calculated as

#### Calculation:

The thermo-reversibility of a gel can be expressed as:

Gel  $\rightarrow$  liquid

The equilibrium constant can be expressed as ;

$$K_{eqm} = [\text{Gelator}] / [\text{Gel}]$$

Assuming unit activity of the gel, the equilibrium constant can be expressed as :

$$K = [\text{Gelator}]$$

The Gibbs free energy change ( $\Delta G^{\circ}$ ) during gel melting can be obtained by the following equation

$$\Delta G^{\circ} = -RT \ln K = \Delta H^{\circ} - T \Delta S^{\circ}$$

Hence,  $\ln K = -\Delta H^\circ / RT + \Delta S^\circ / R$

The gel melting temperature ( $T_{gel}$ ) increases with increasing concentration of the “gelator”.

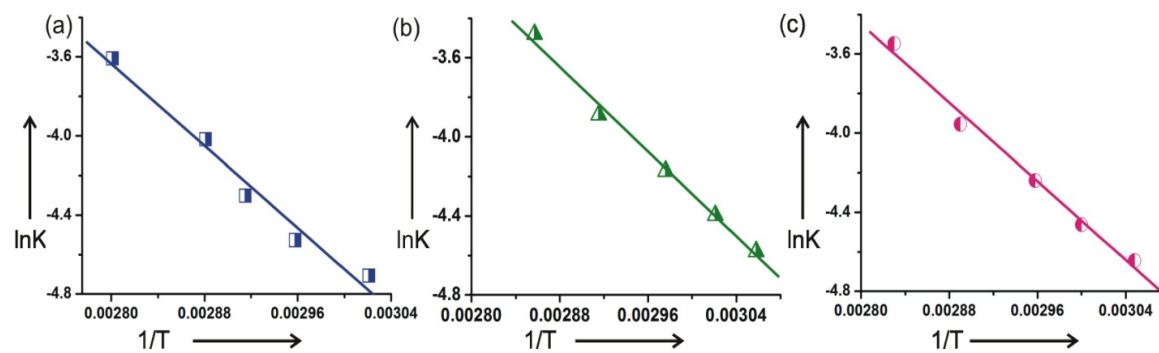

**Figure S1.** Plot of  $\ln K$  vs  $1/T$  where  $T$  is the gel to sol transition temperature  $T_{gel}$  (a) **2b**, (b) **2c**, (c) **2d**

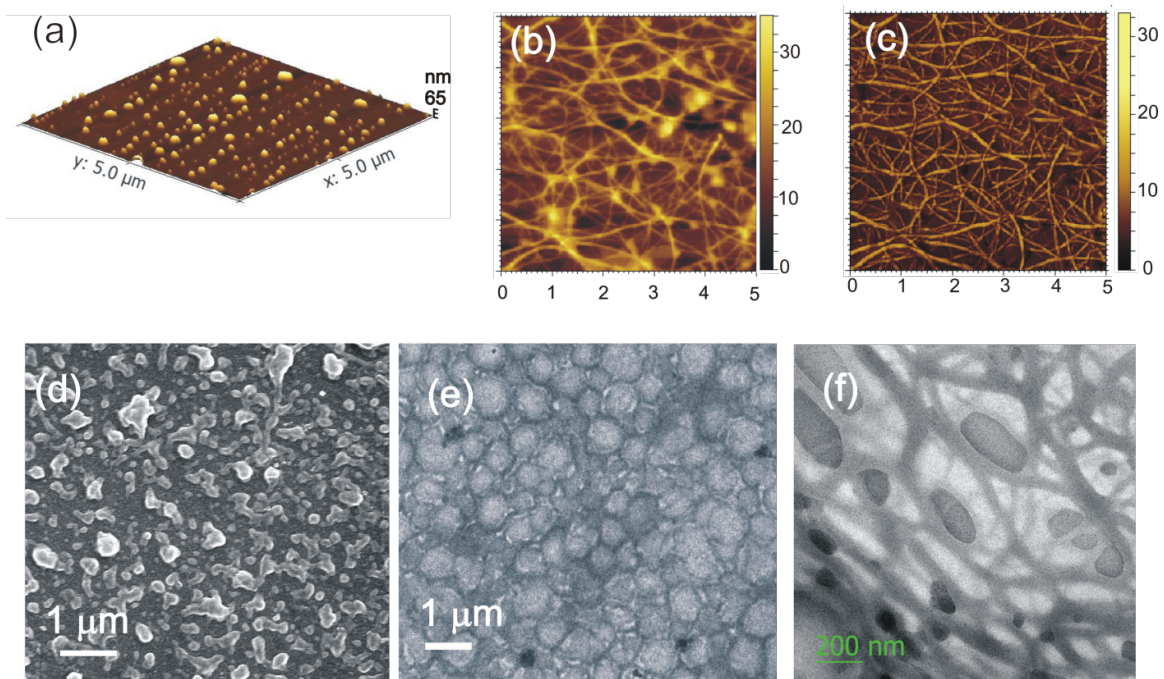

**Figure S2.** (a) AFM images of 0.12 % (w/v) **2c** in 6:1 cyclohexane-chloroform , (b,c) AFM images of 0.14% (w/v) **2d** in 6:1 heptane-chloroform and octane-chloroform, (d) SEM image of (0.11% w/v) **2d** in (6:1 v/v ) chloroform/dodecane and (e,f) TEM images of 0.10 % (w/v) **2d** in 6:1 cyclohexane-chloroform .Samples were collected after 4h on a glass plate, dried slowly and then under reduced pressure and sputter coated with Au for 60 s and analyzed.

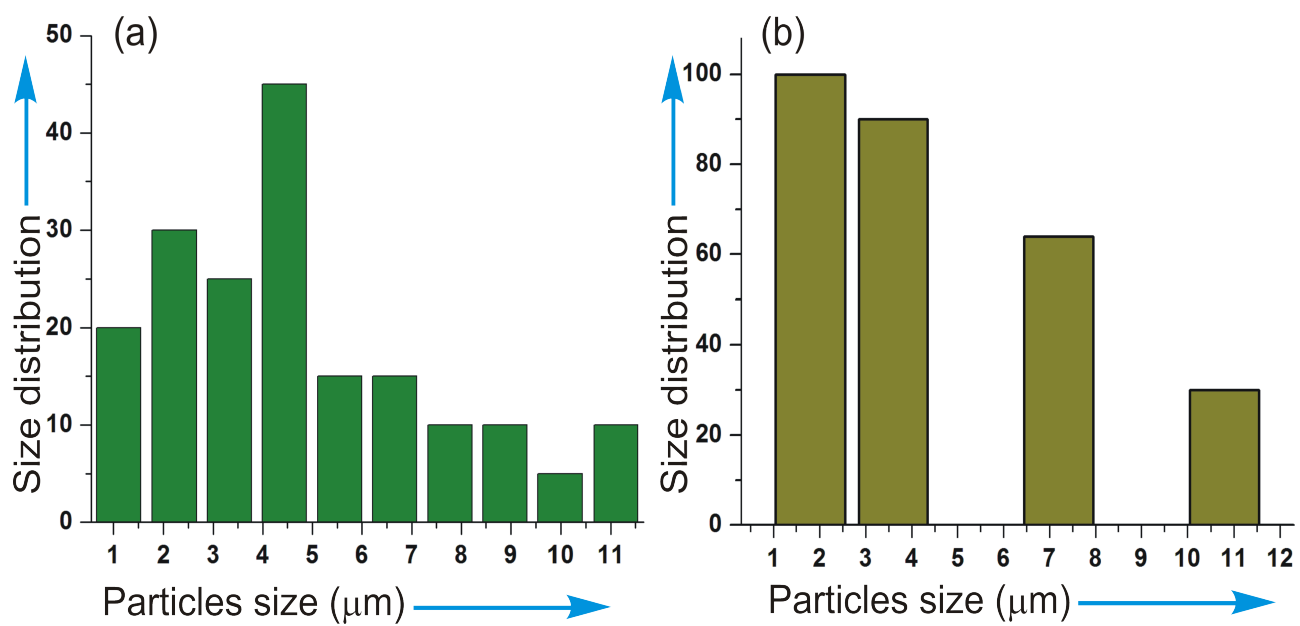

**Figure S3.** Histogram from OPM (a) 3.2 % of **2c** in 5:1 (v/v) DMSO-Water; (b) 3.25 % of **2d** in 5:1 (v/v) DMSO-Water

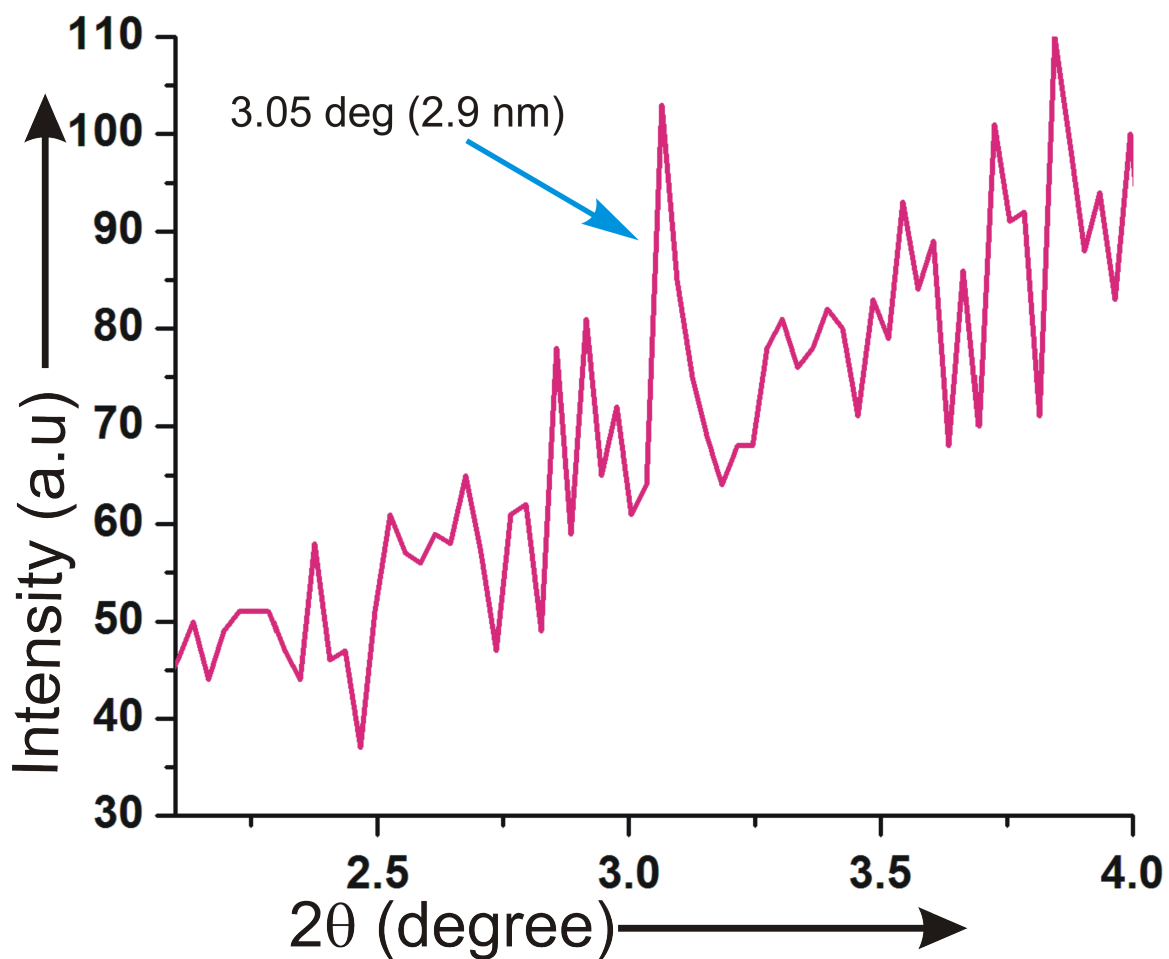

Figure S4. X-ray diffraction studies of the self-assemblies of **2c** (0.11% w/v) in DMSO-water (5:1 v/v).

**DLS studies:** Dynamic light scattering (DLS) studies were carried out in a Zetasizer Nanoseries instrument (Model Nano ZS90). In all the cases studied, polydisperse self-assemblies of varied diameters were observed. For **2c** (0.10% w/v) and **2d** (0.10% w/v) in cyclohexane-chloroform (6:1 v/v), average size of 310.8 nm and 151.5 nm respectively were observed. For the self-assemblies of **2d** (0.10% w/v) in octane-chloroform (6:1), the average size was 75.3 nm.

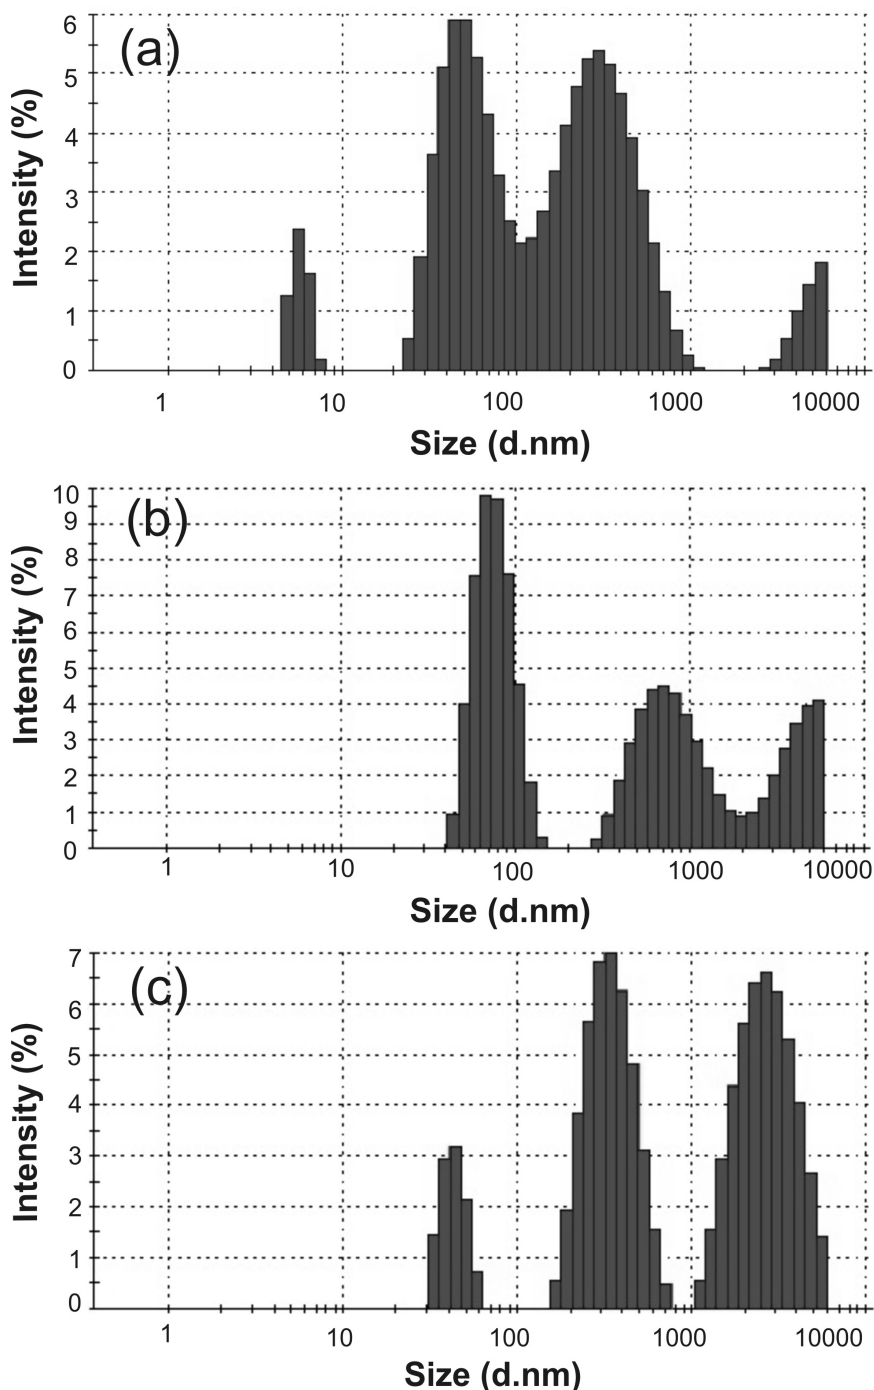

**Figure S5.** Dynamic light scattering (DLS) studies of (a) **2d** in 6:1 (v/v) n-octane-chloroform (0.10% w/v), (b) **2d** in 6:1 (v/v) cyclohexane-chloroform (0.10% w/v), (c) **2c** in 6:1 (v/v) cyclohexane-chloroform (0.10% w/v)



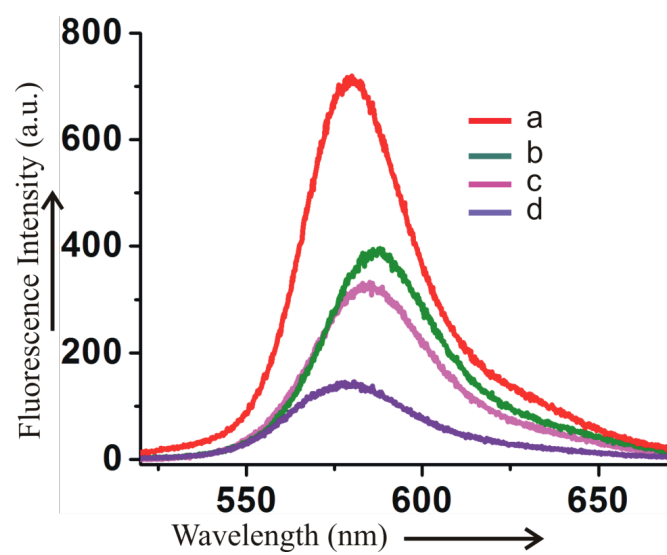

**Figure S6.** Fluorescence emission spectra ( $\lambda_{\text{max}}$  510 nm) of release of encapsulated Rho-B by sonication at different duration of sonication time, a = 45 min, b = 30 min, c = 15 min, (d) encapsulated Rho-B inside the vesicular self-assemblies of **2d** after 24 h.

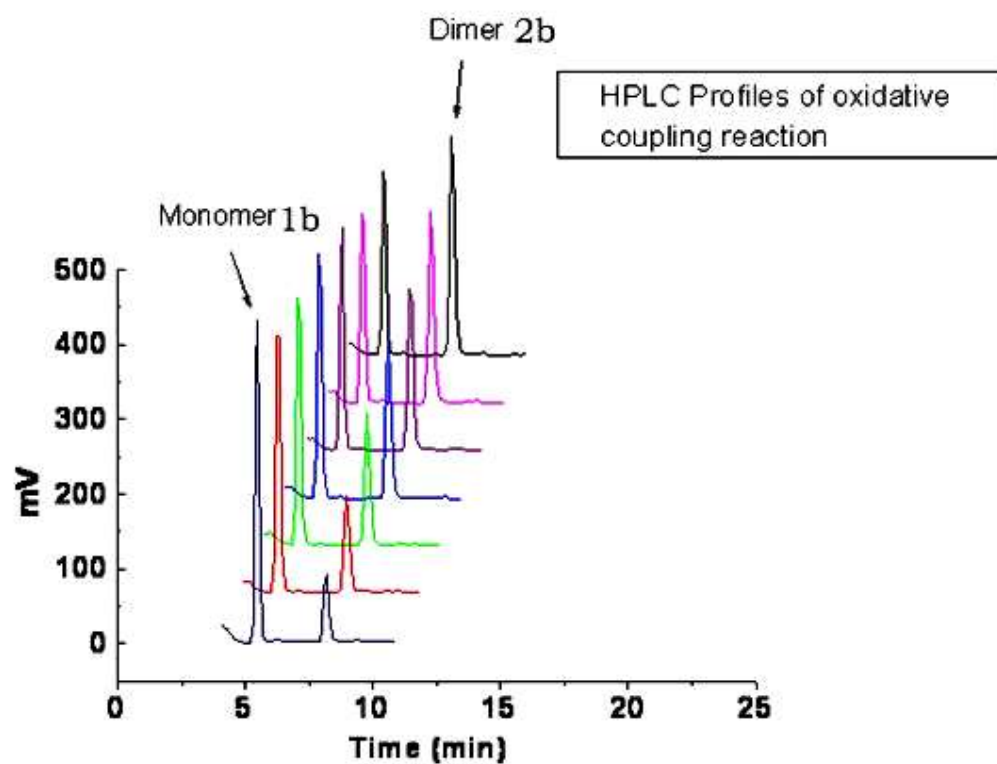

**Figure 7:** HPLC profiles for the oxidative coupling of **1b** to **2b**. Aliquots were collected at 10 min time intervals. Increase in the concentration of the dimer **2b** was observed with concomitant decrease of the monomer **1b** at the initial stage of the reaction. The reaction mixture became heterogeneous after about an hour.

$^1\text{H-NMR}$ ,  $\text{CDCl}_3$  (400 MHz)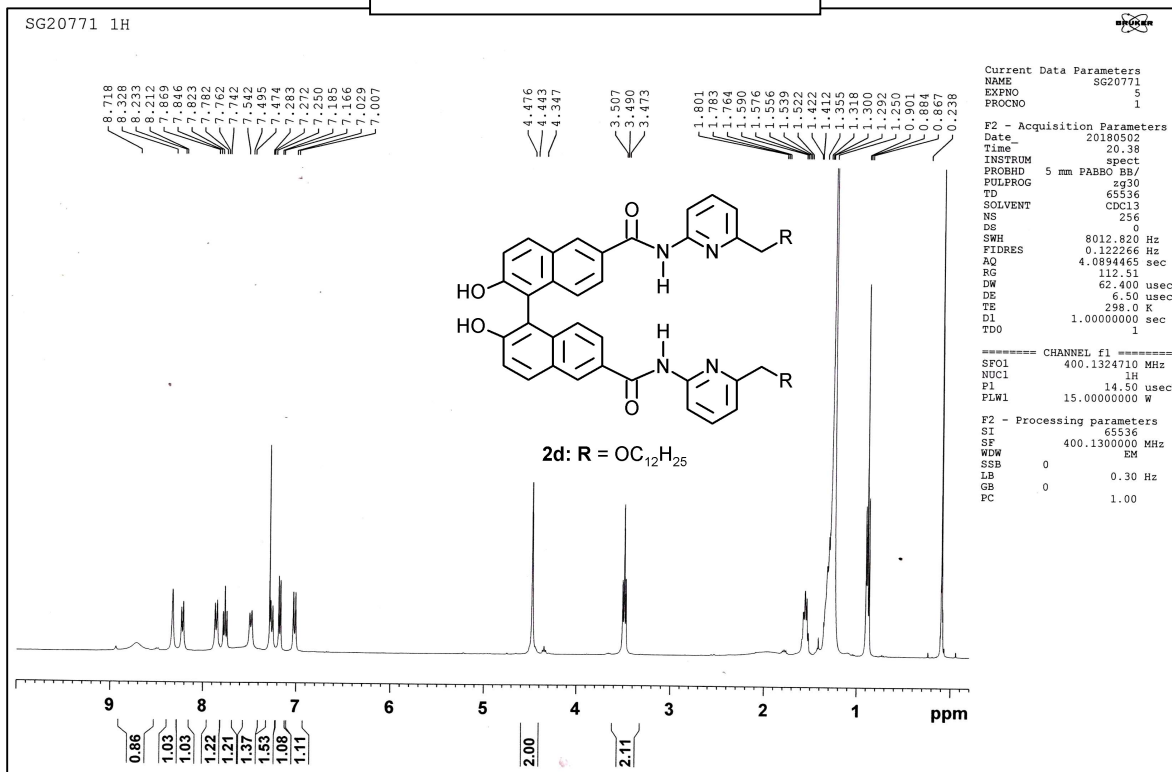 $^{13}\text{C-NMR}$ ,  $\text{CDCl}_3$  (100 MHz)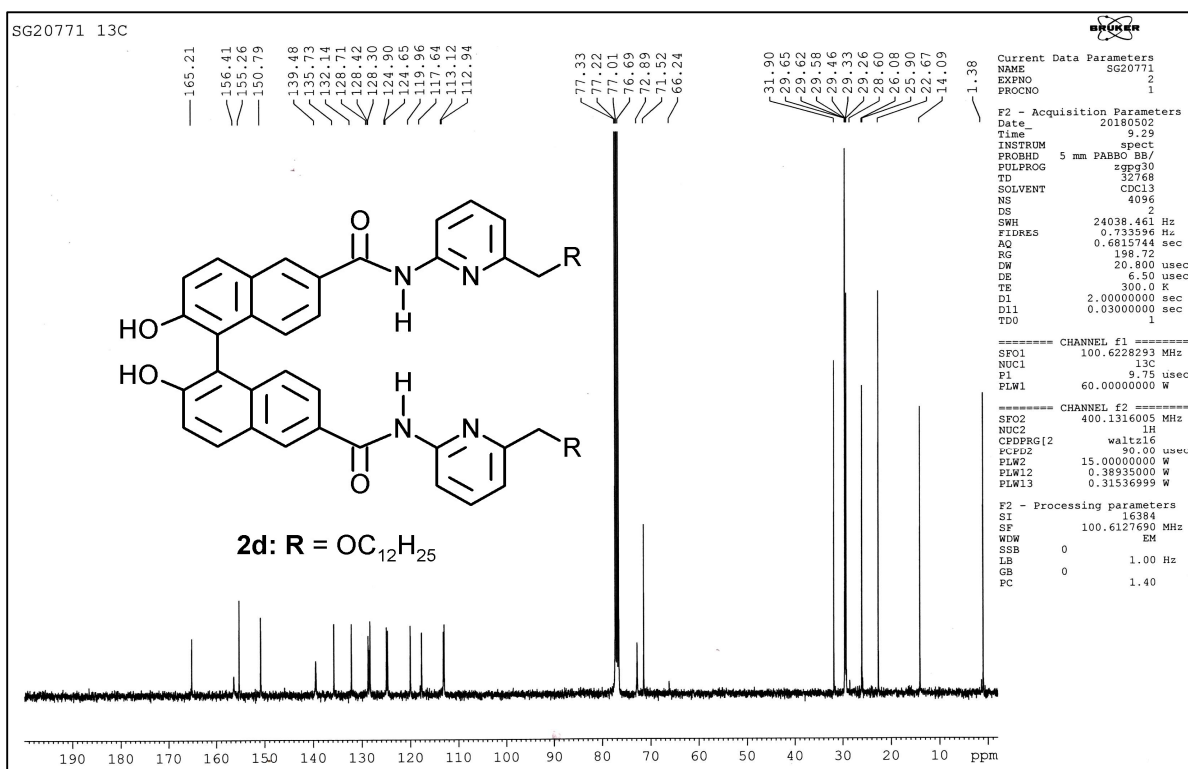

DEPT-90, CDCl<sub>3</sub> (100 MHz)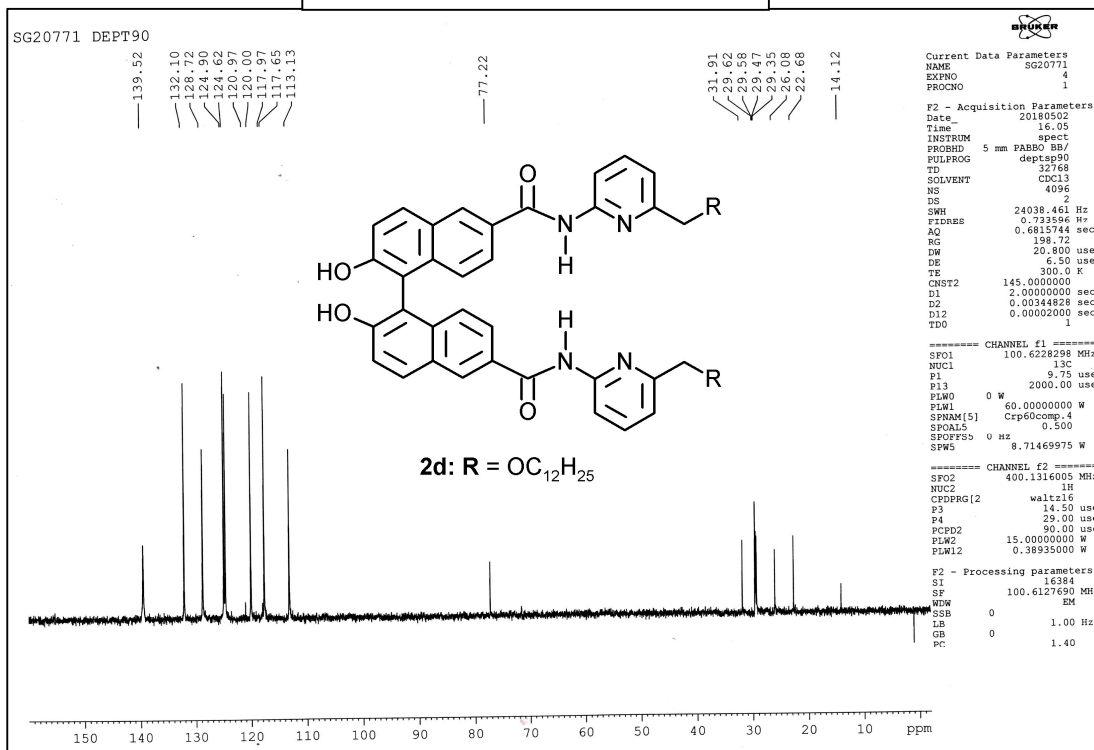DEPT-135, CDCl<sub>3</sub> (100 MHz)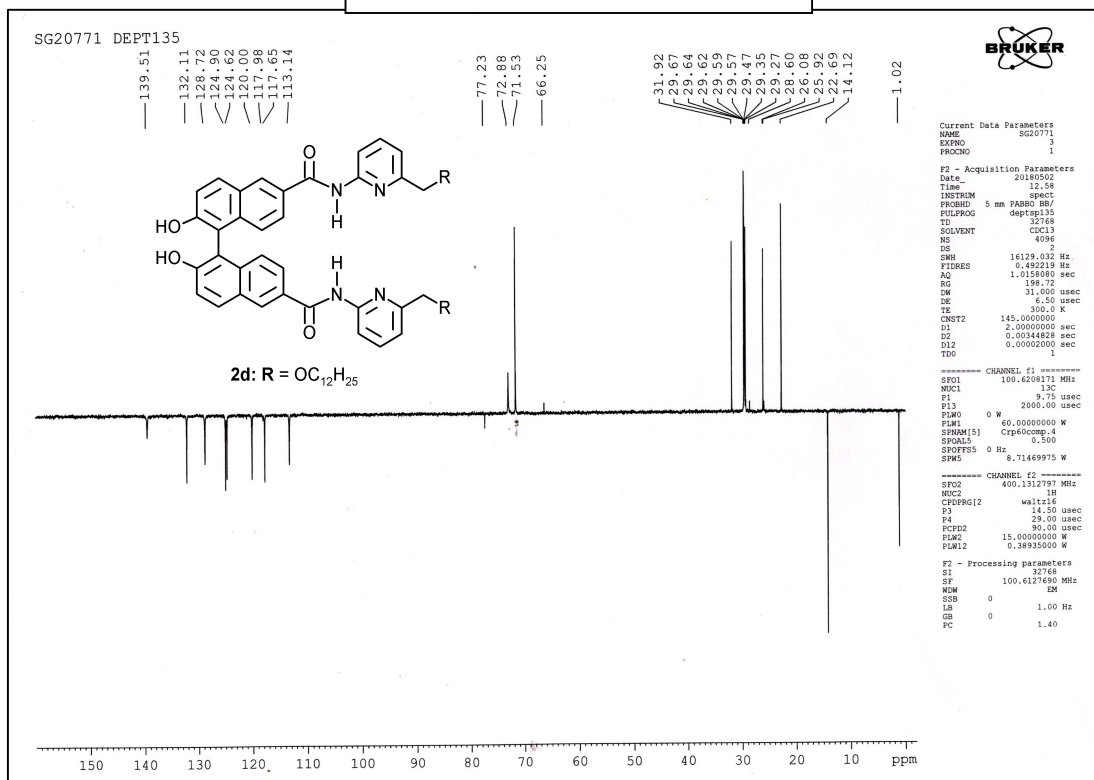

HRMS

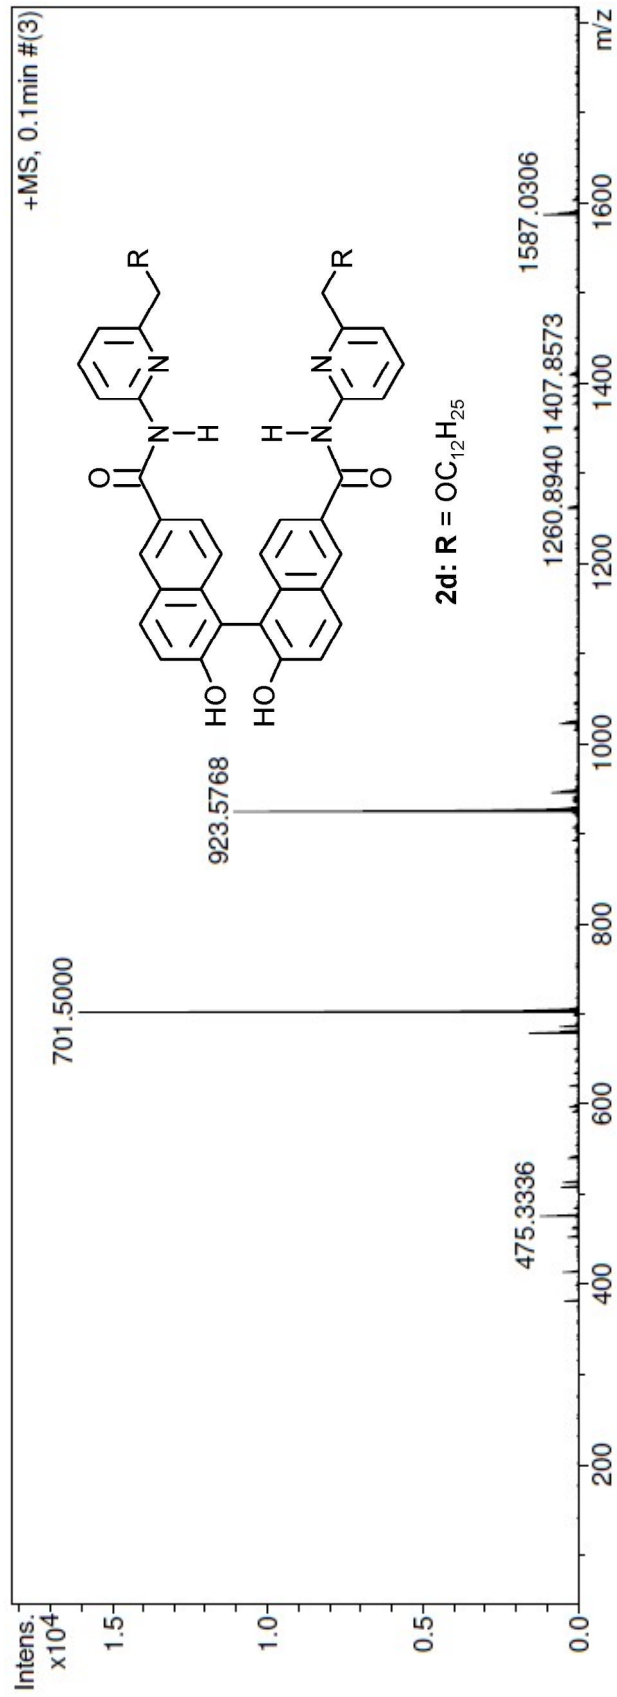

# <sup>1</sup>H-NMR, CDCl<sub>3</sub> (400 MHz)

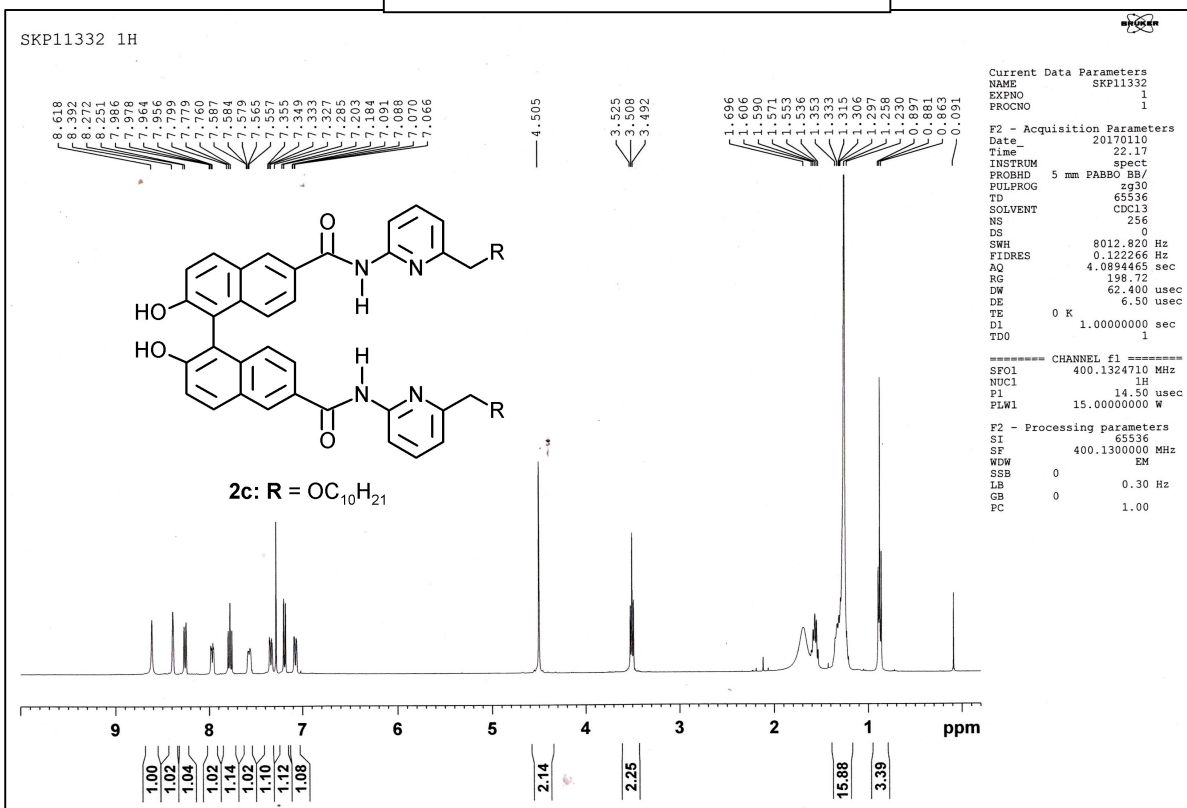

# <sup>13</sup>C-NMR, CDCl<sub>3</sub> (100 MHz)

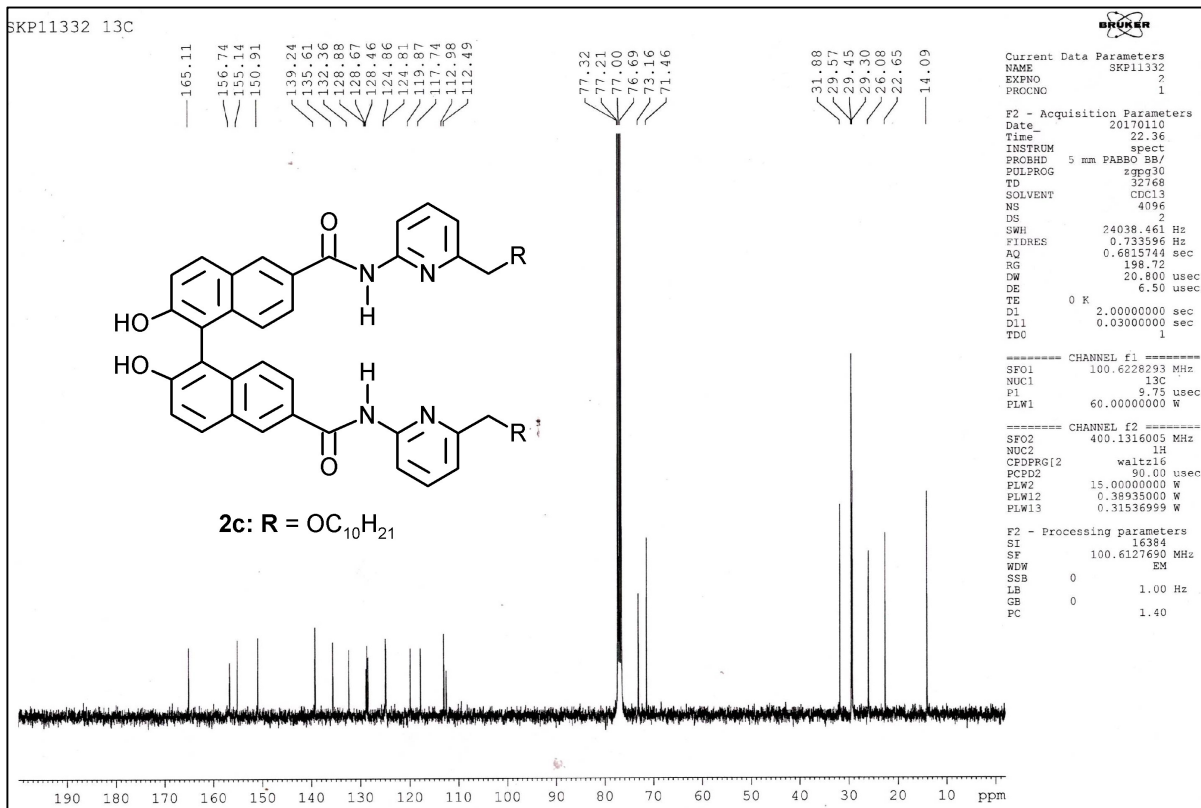

DEPT-90, CDCl<sub>3</sub> (100 MHz)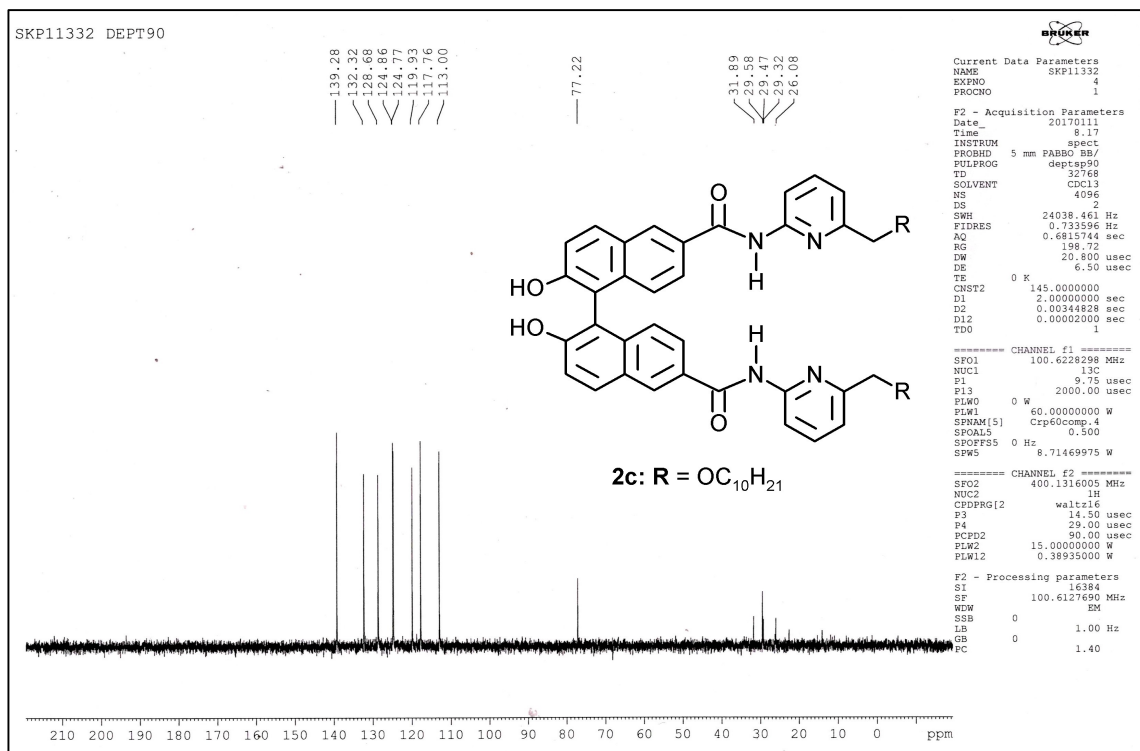DEPT-135, CDCl<sub>3</sub> (100 MHz)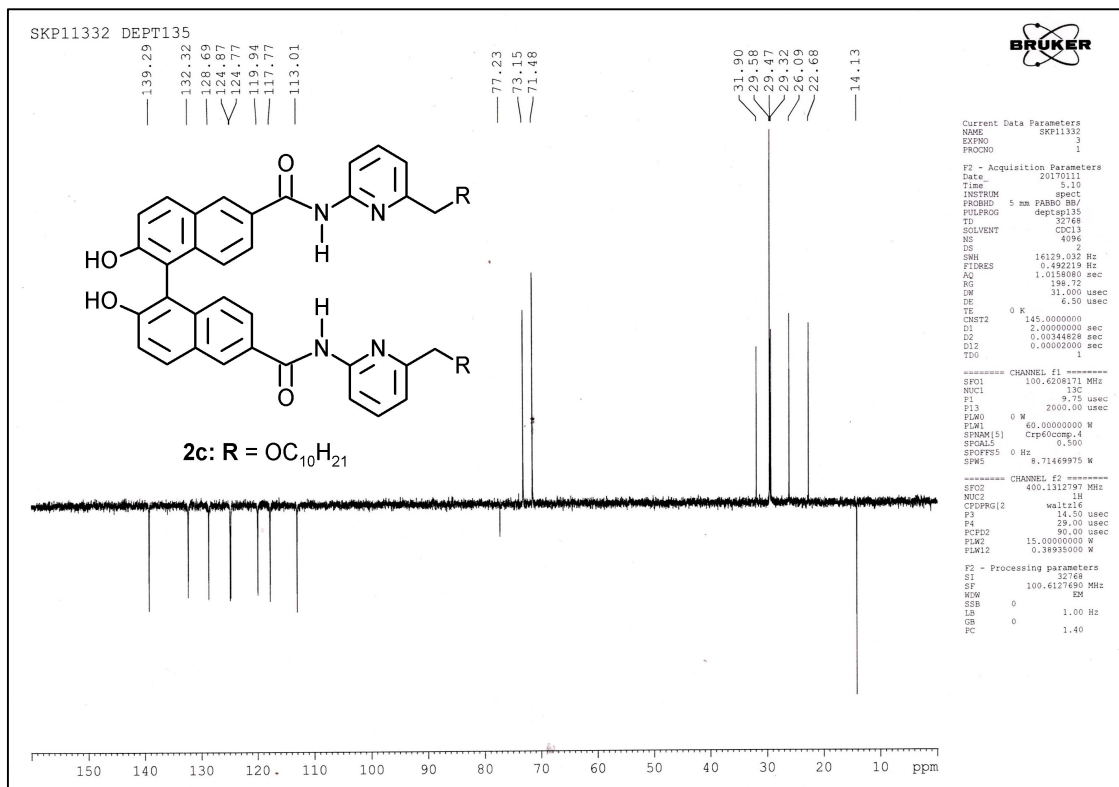

HRMS 2C

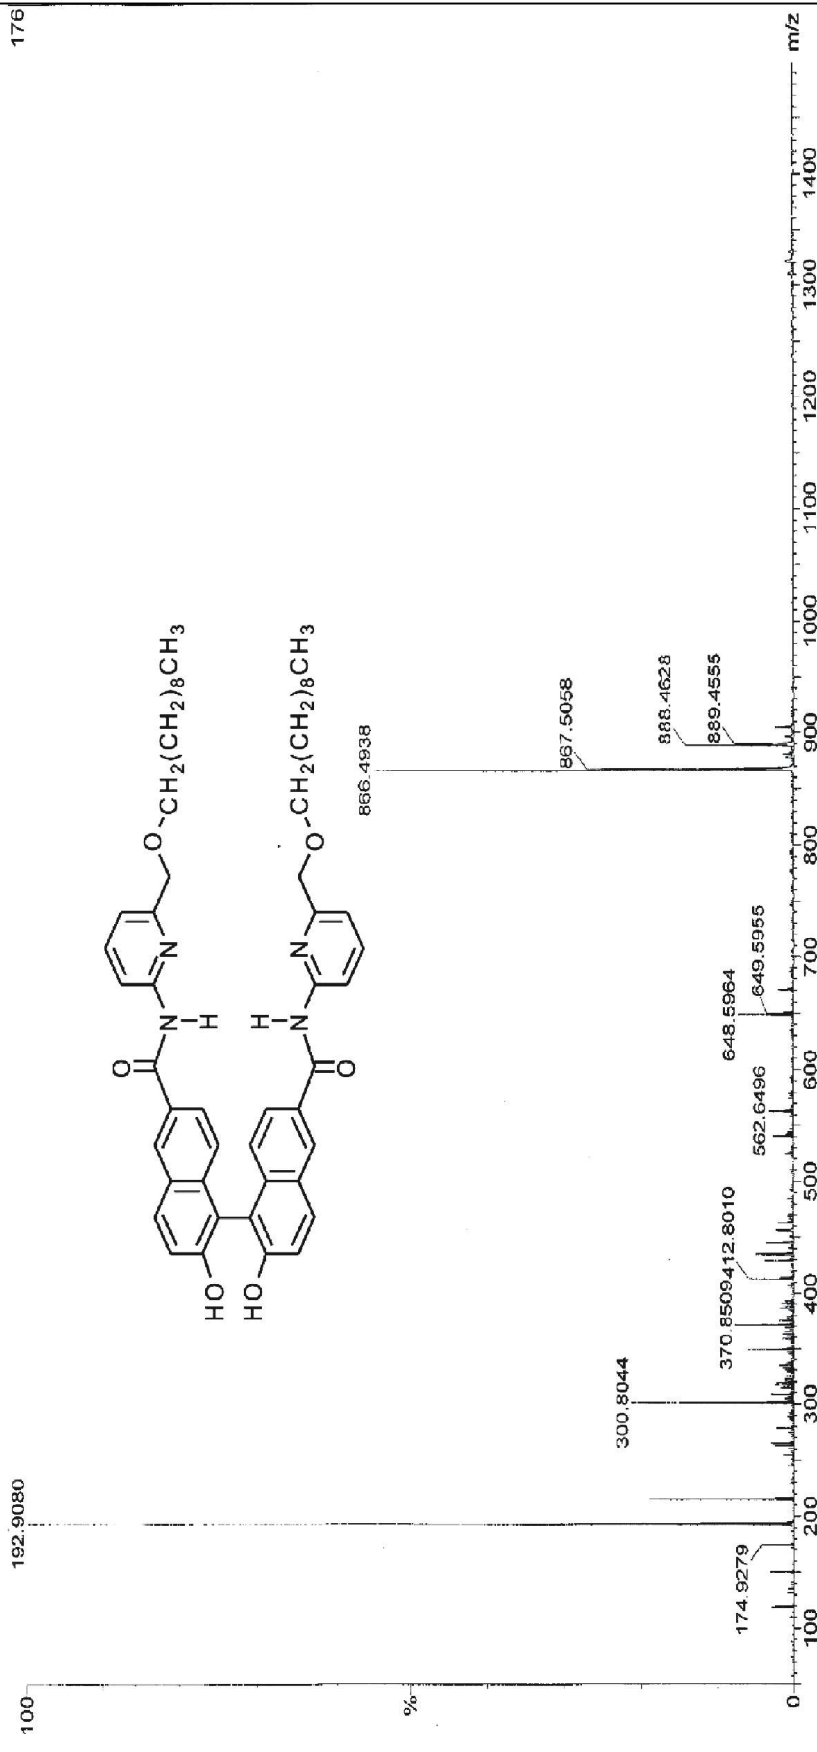



1H-NMR, CDCl<sub>3</sub> (100 MHz)

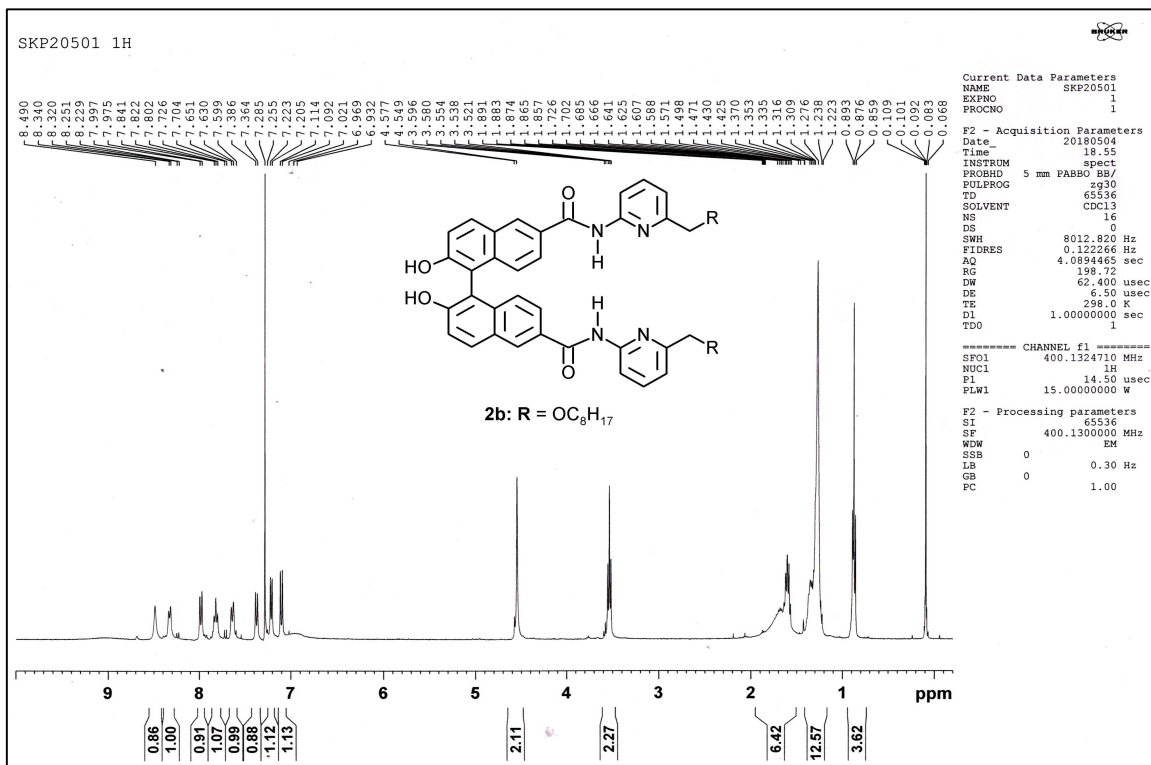

<sup>13</sup>C-NMR, CDCl<sub>3</sub> (100 MHz)

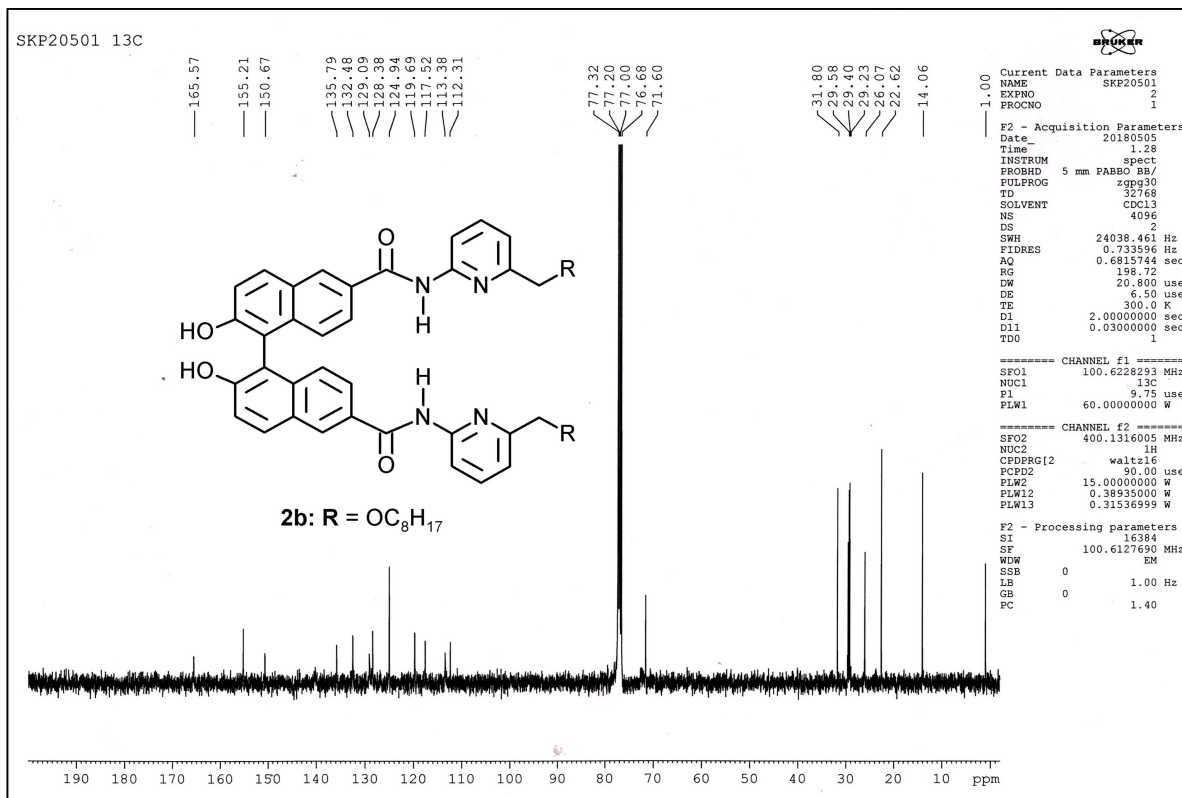

DEPT-90, CDCl<sub>3</sub> (100 MHz)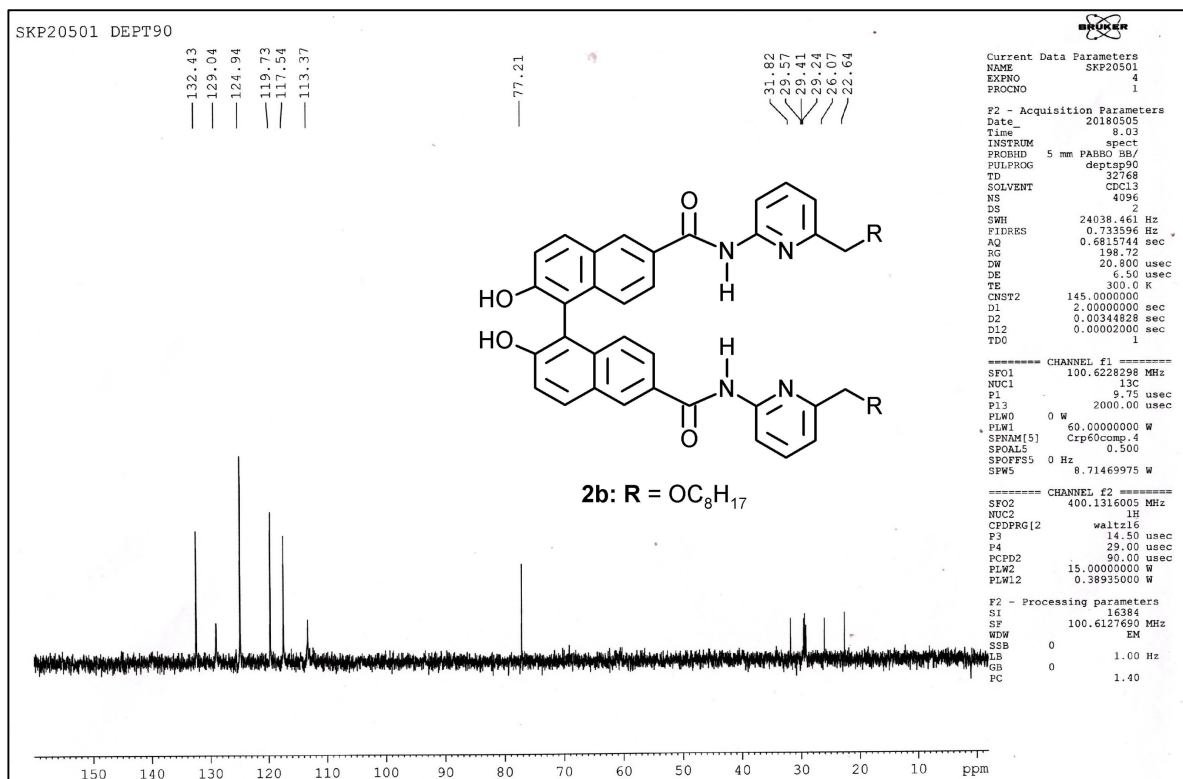DEPT-135, CDCl<sub>3</sub> (100 MHz)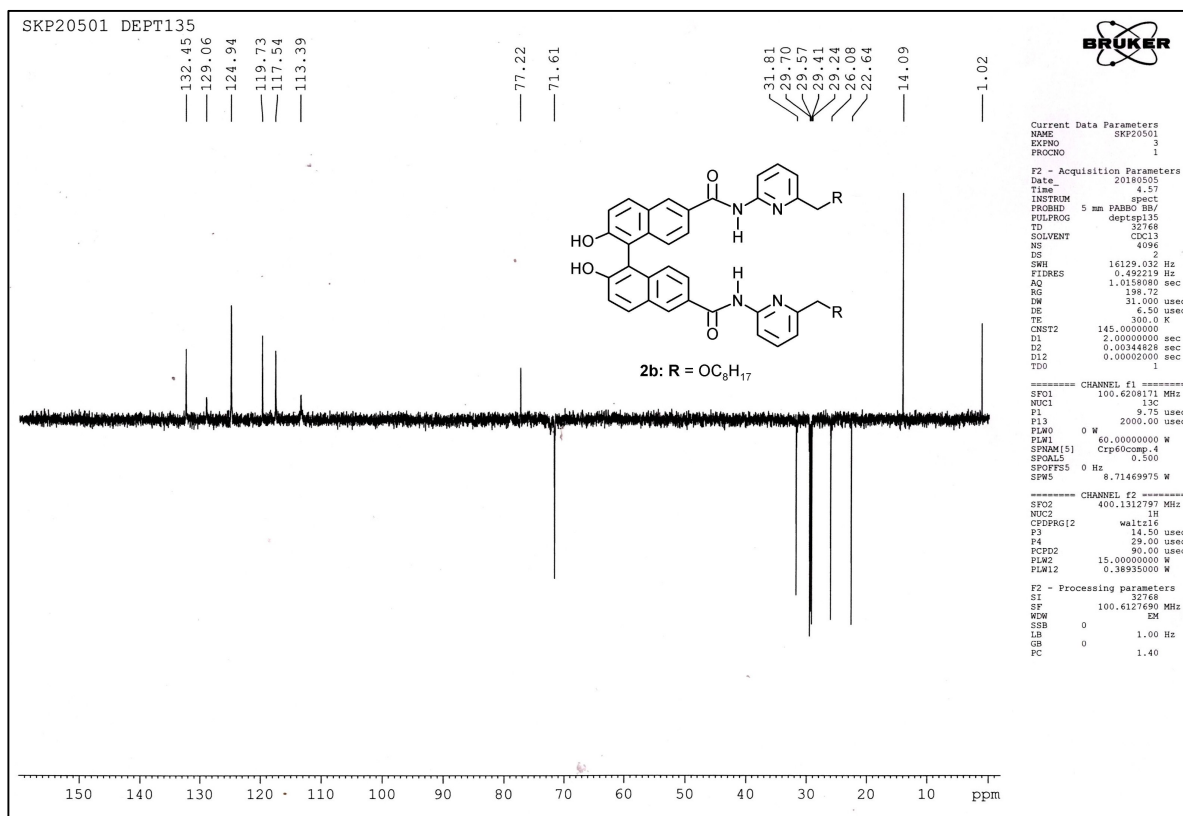

HRMS

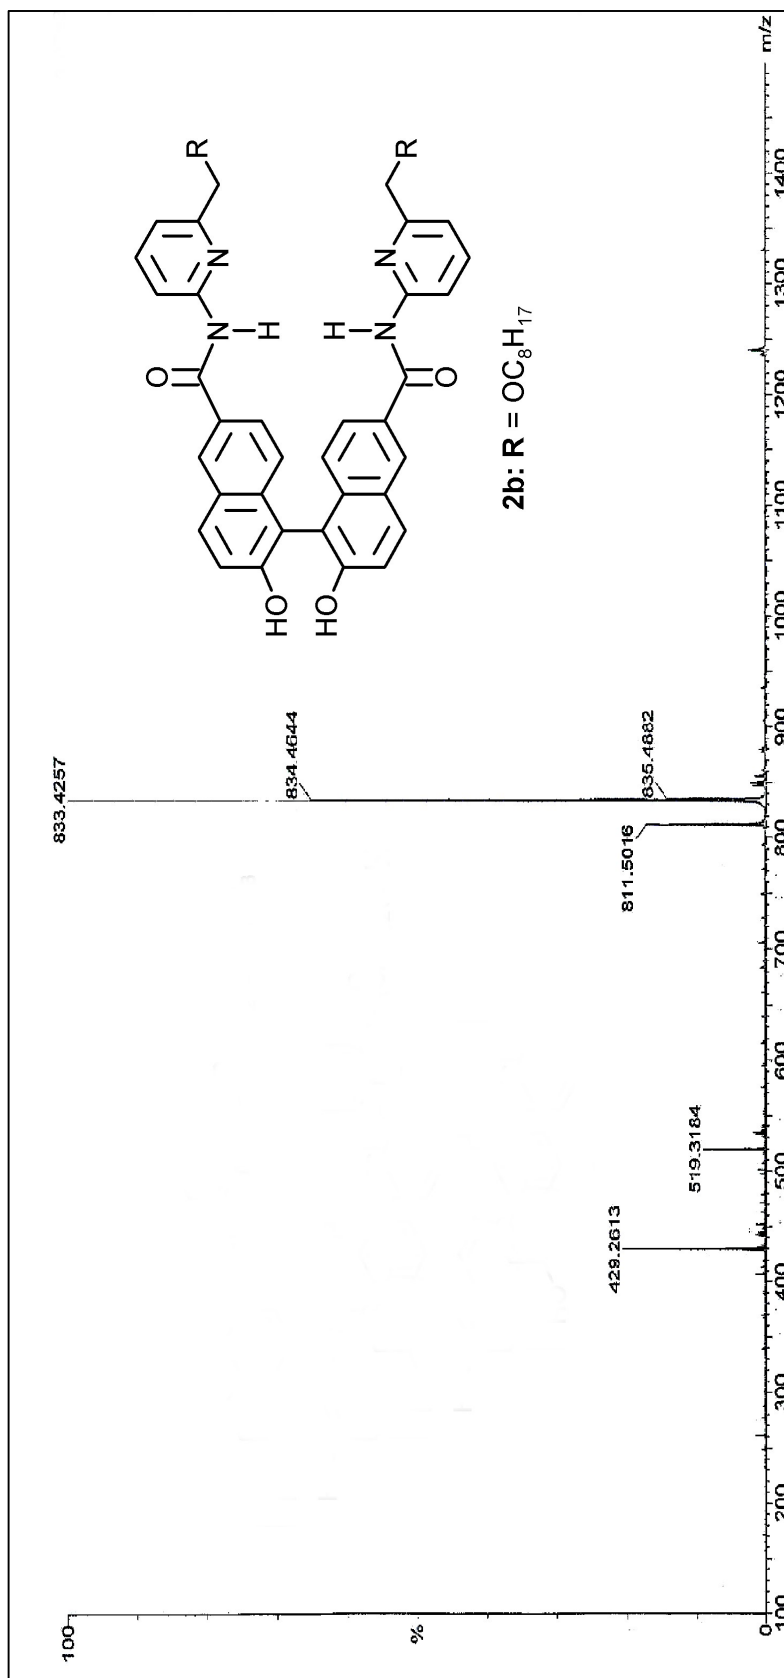

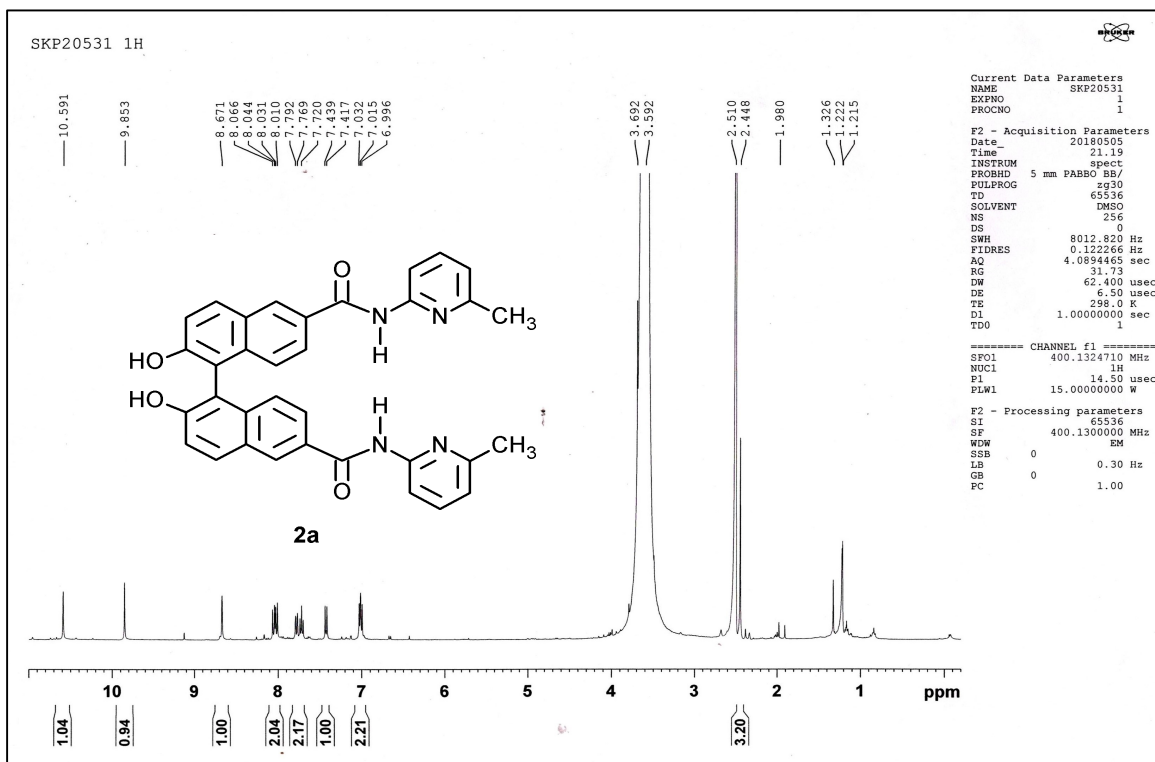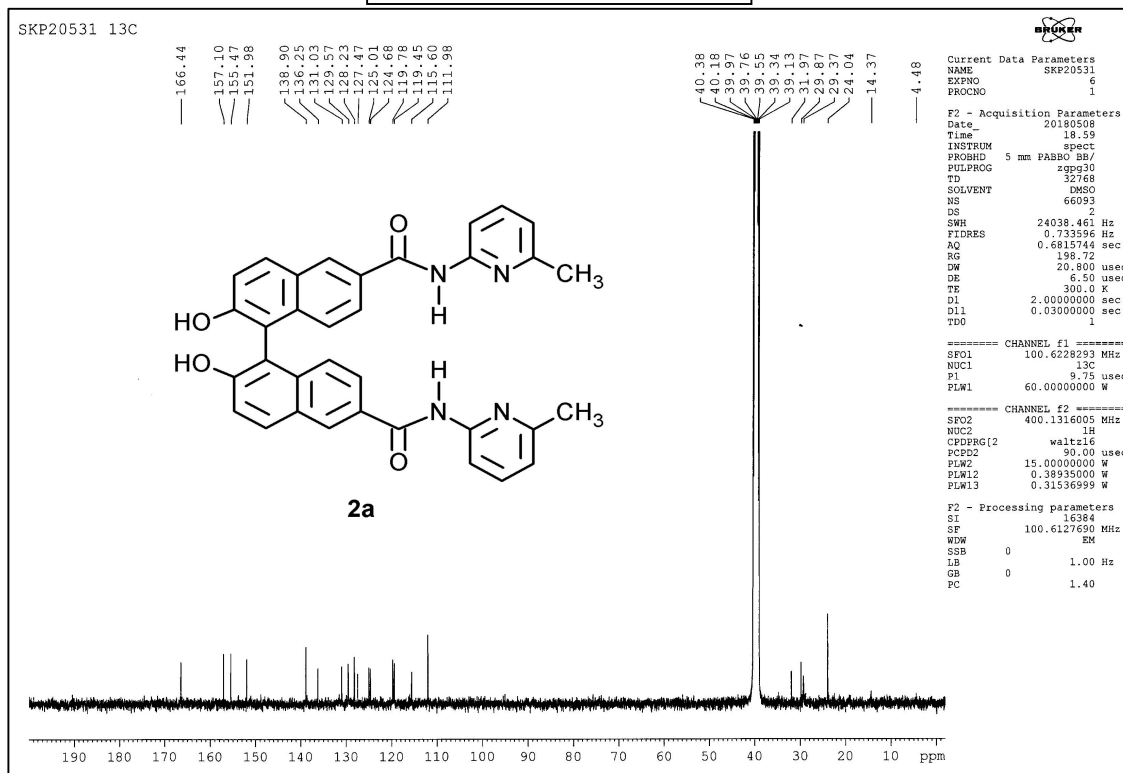

DEPT-90, DMSO-d<sub>6</sub> (100 MHz)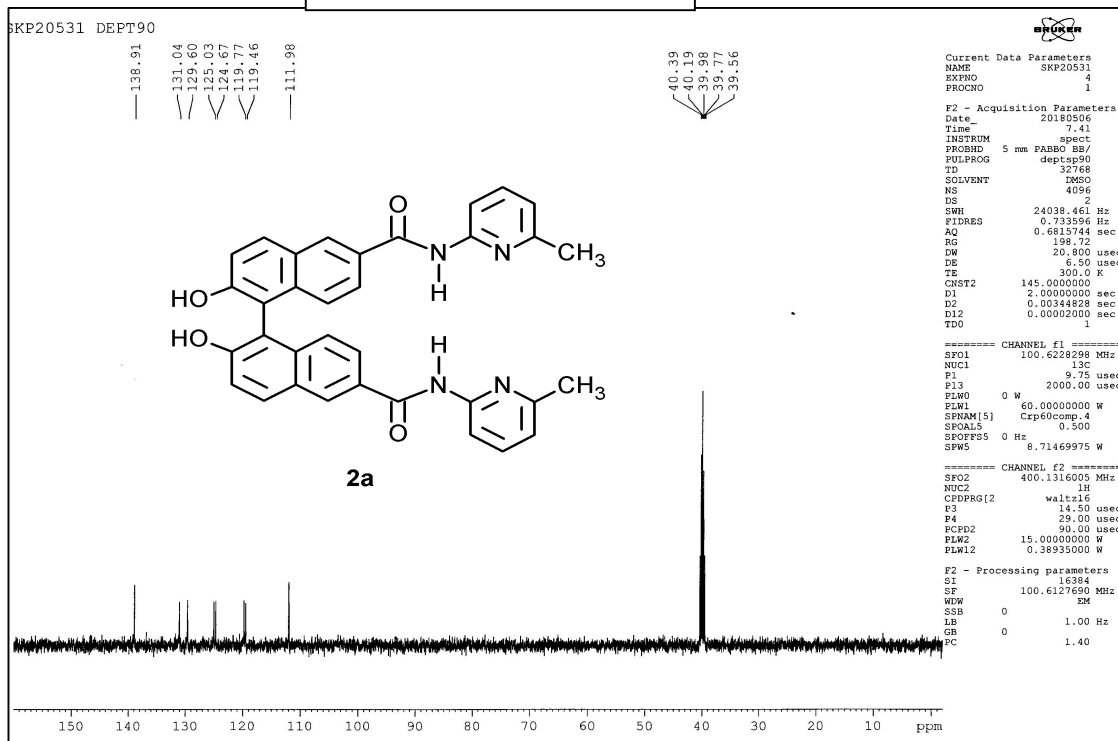DEPT-135, DMSO-d<sub>6</sub> (100MHz)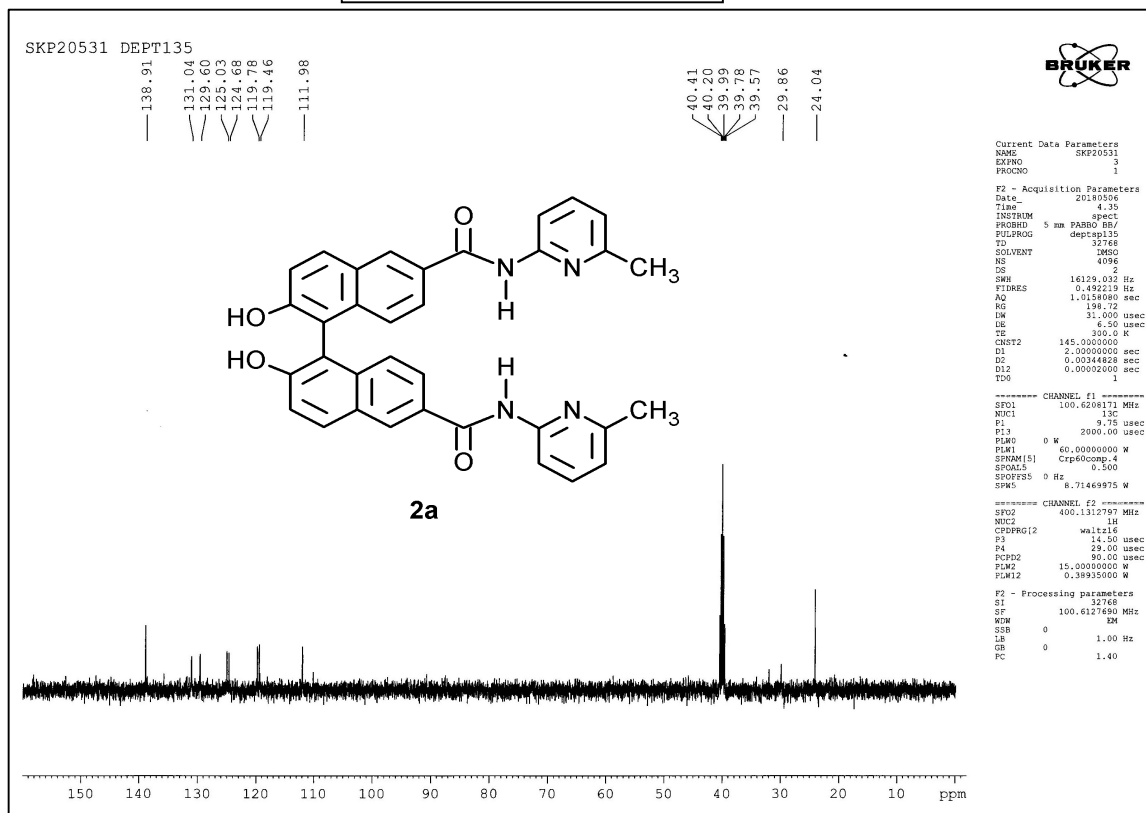

## HRMS

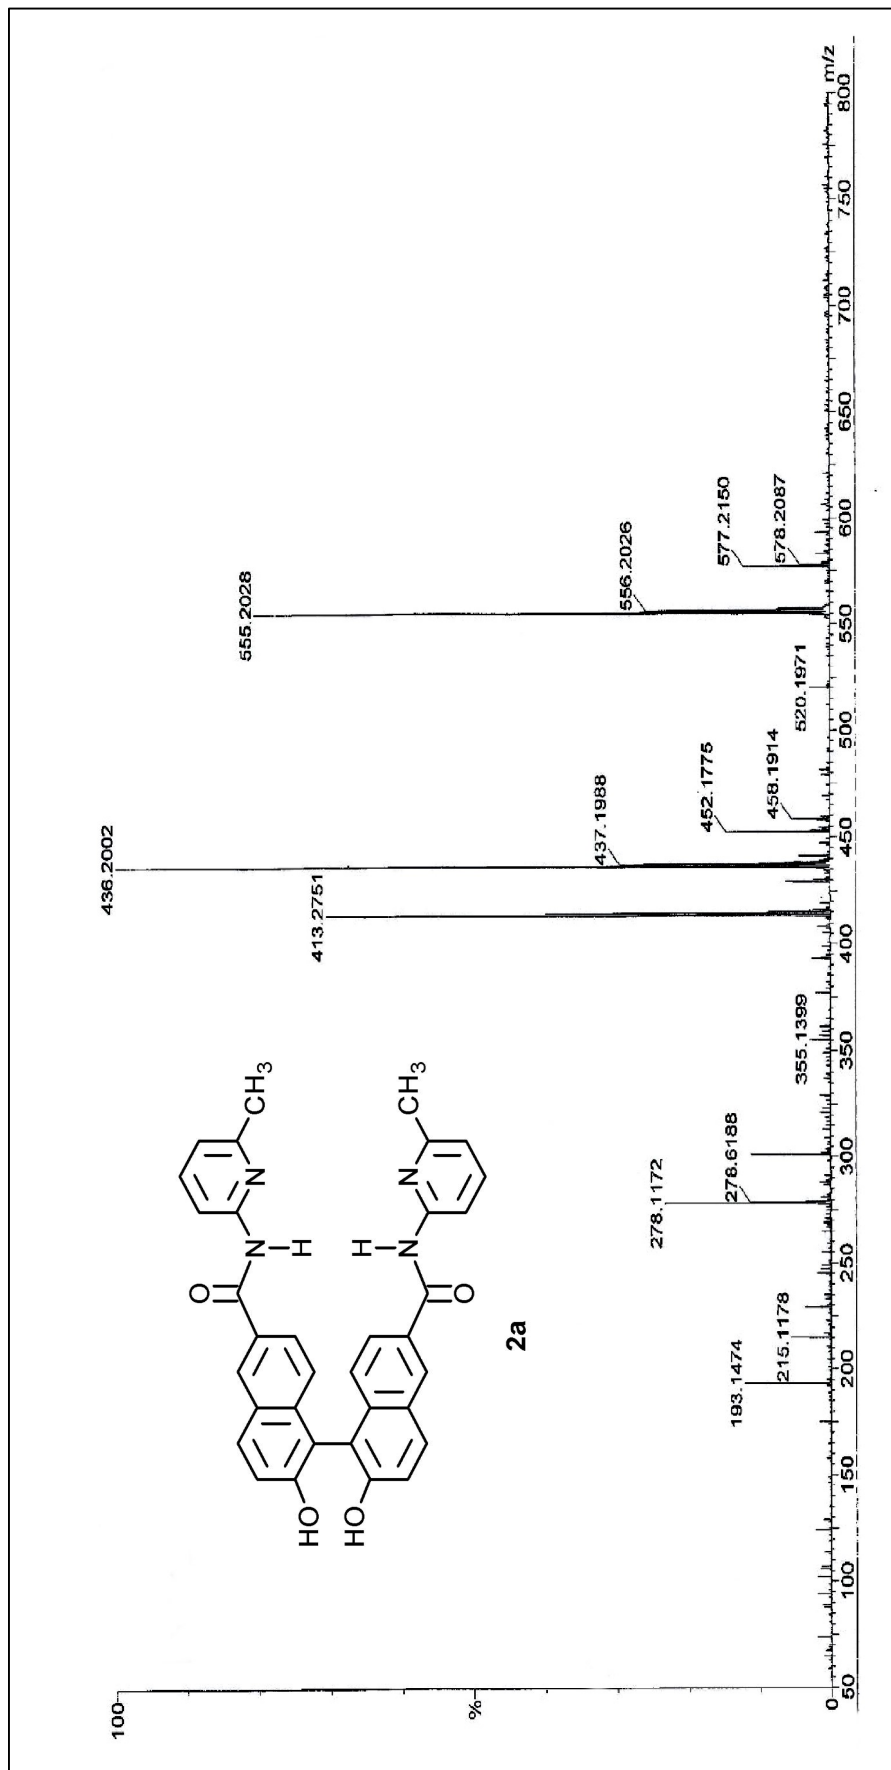

$^1\text{H-NMR}$ ,  $\text{CDCl}_3$  (400 MHz)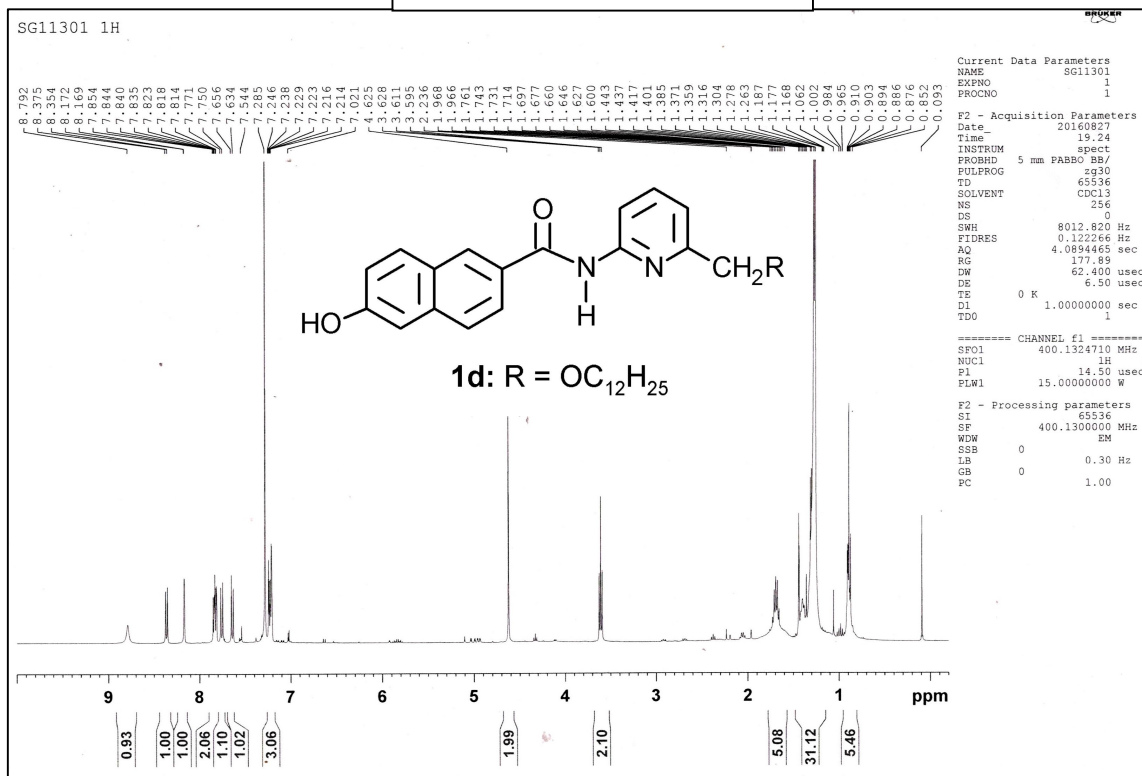 $^{13}\text{C-NMR}$ ,  $\text{CDCl}_3$  (100 MHz)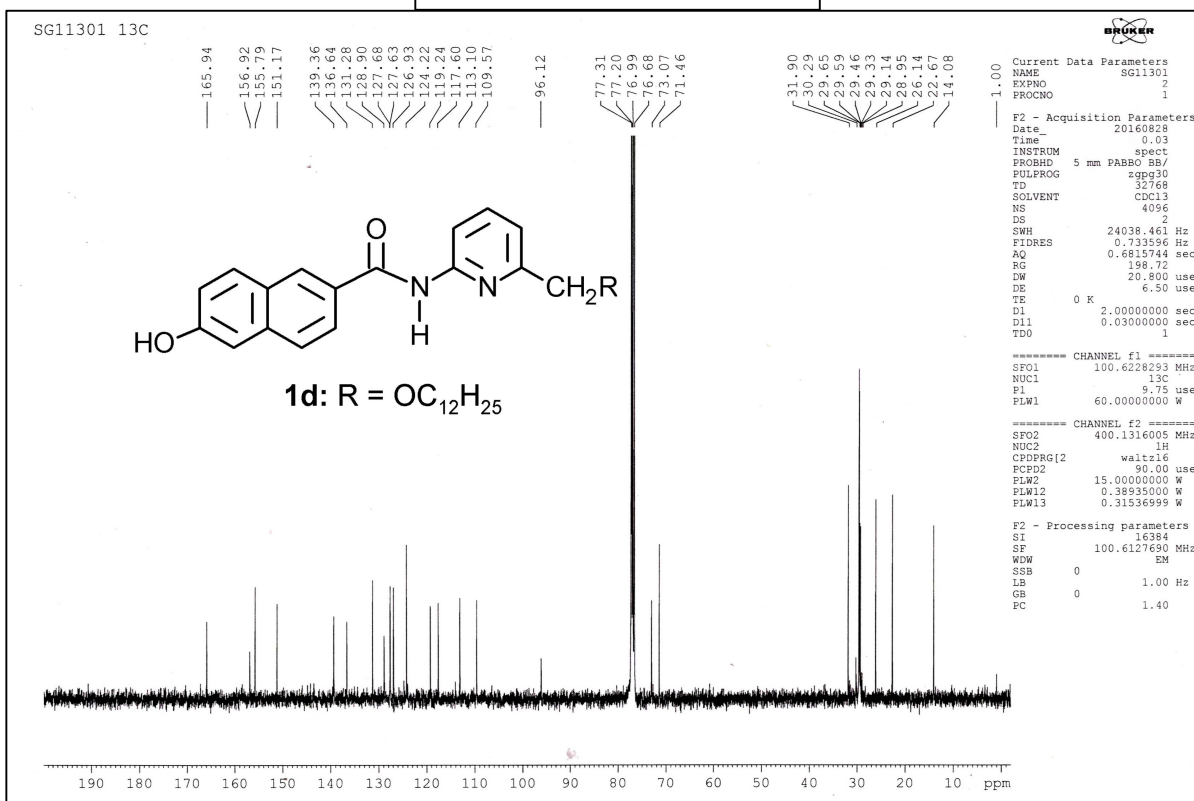

HRMS

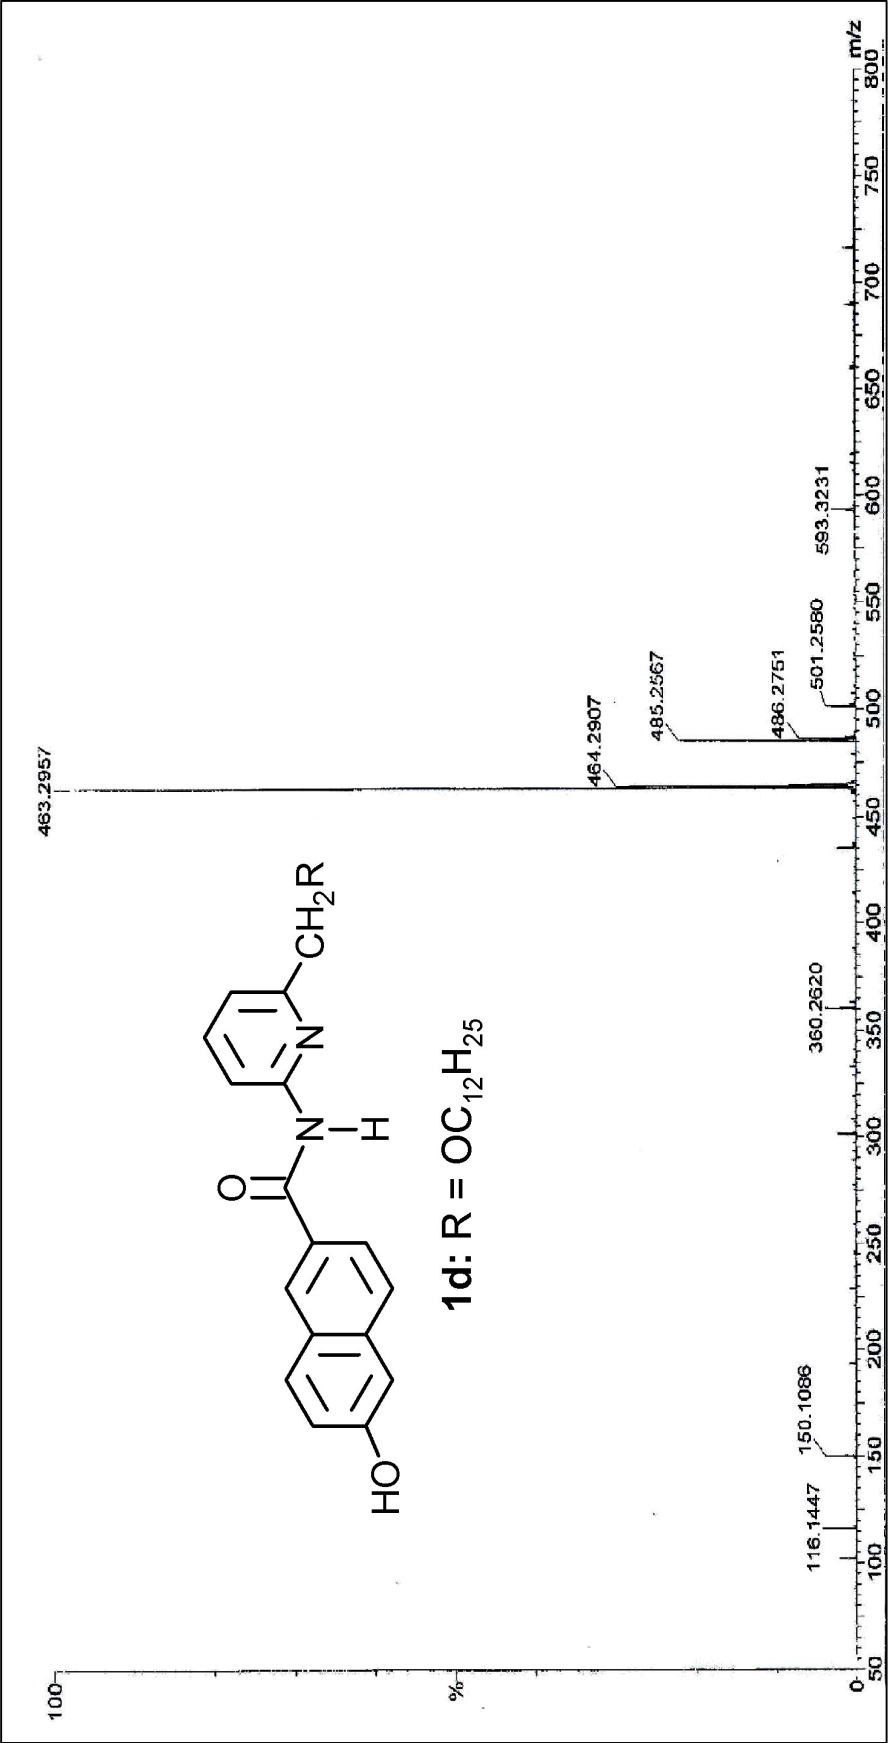



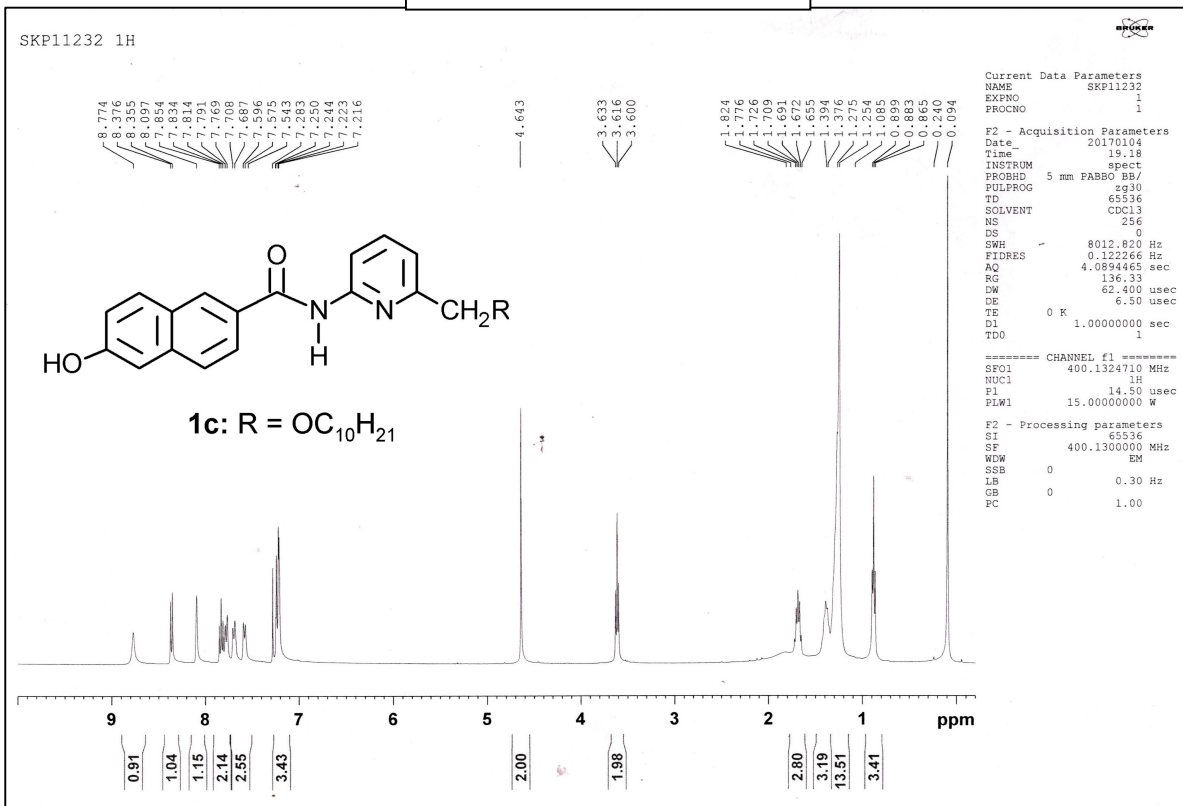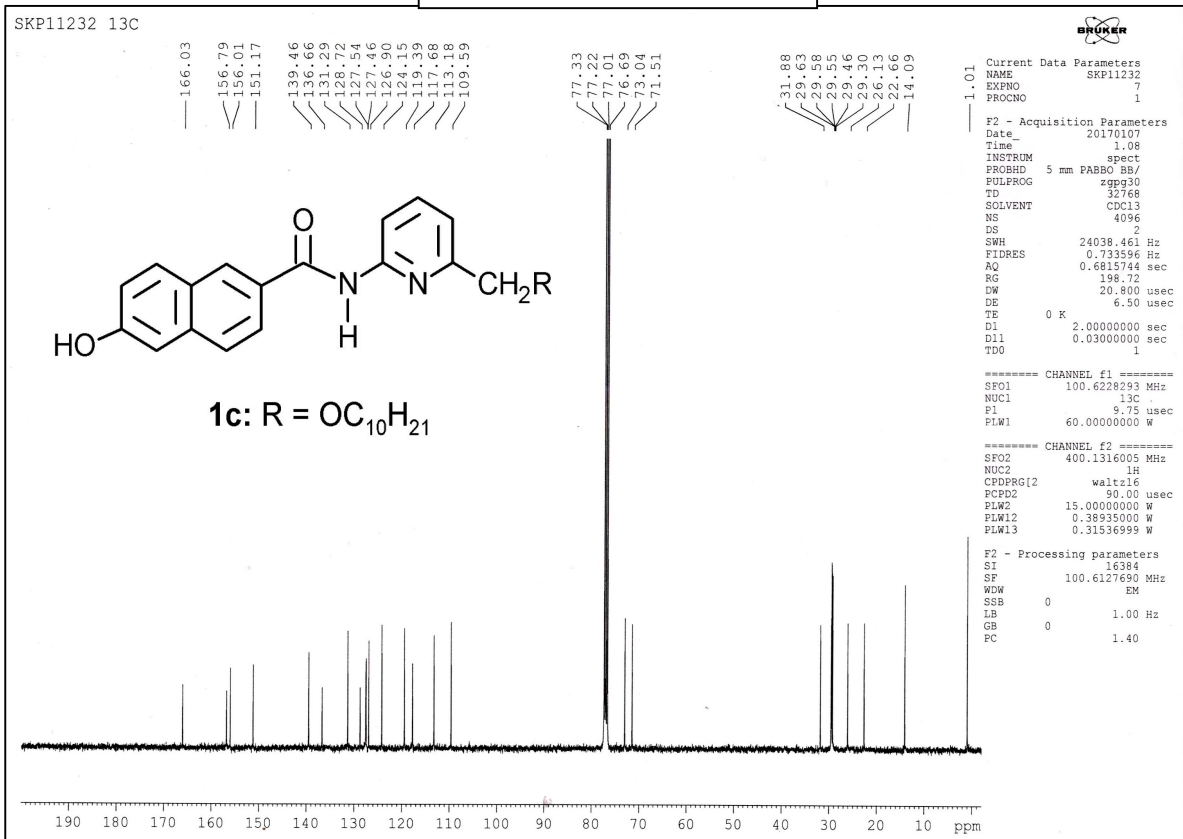

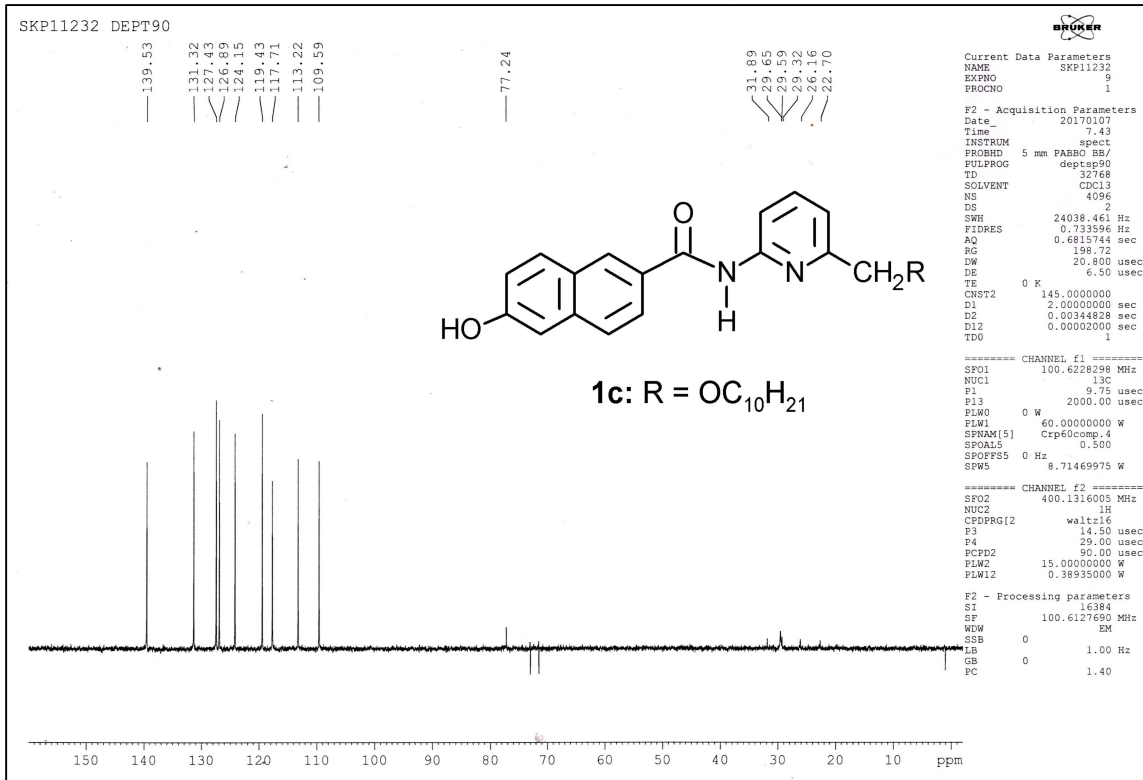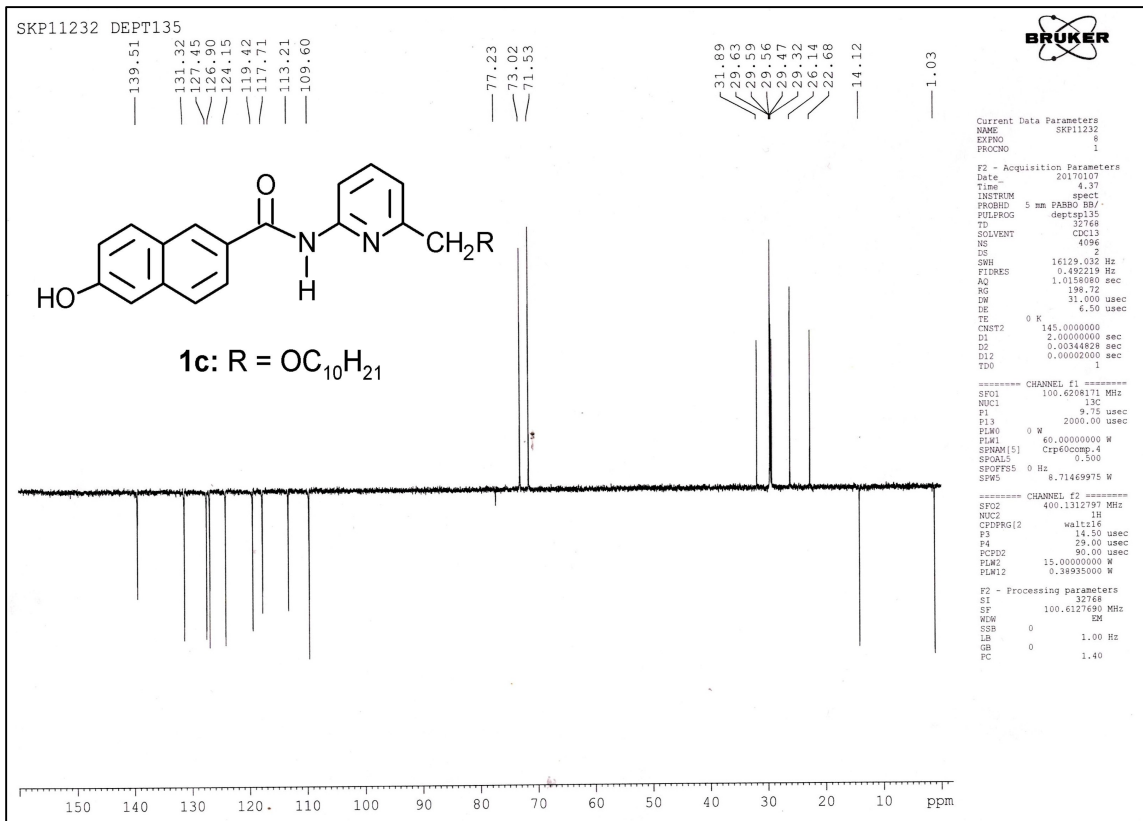

## HRMS

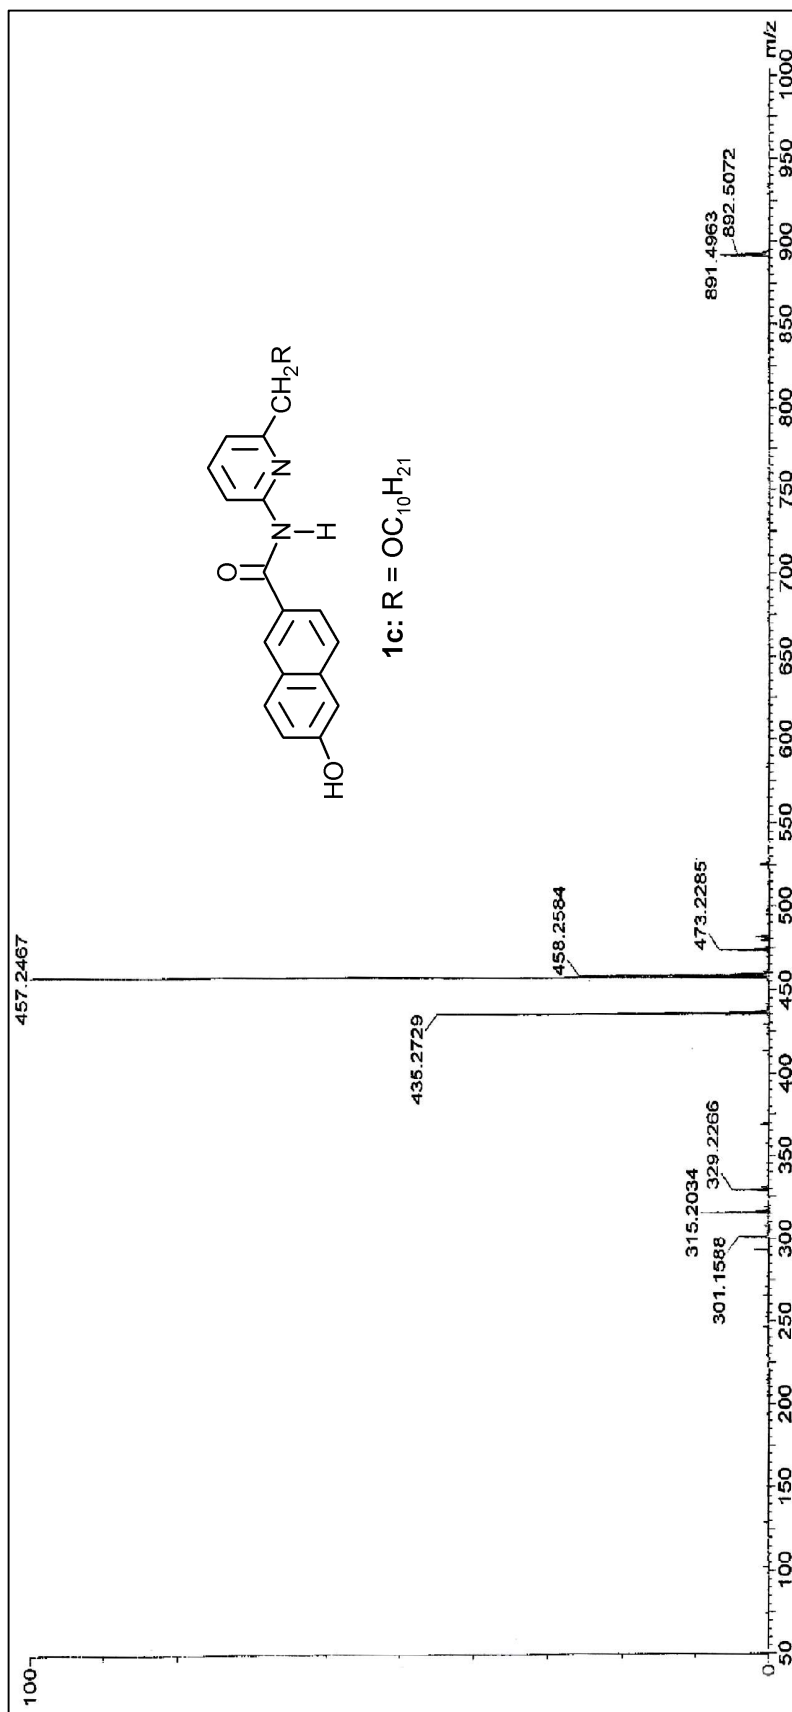

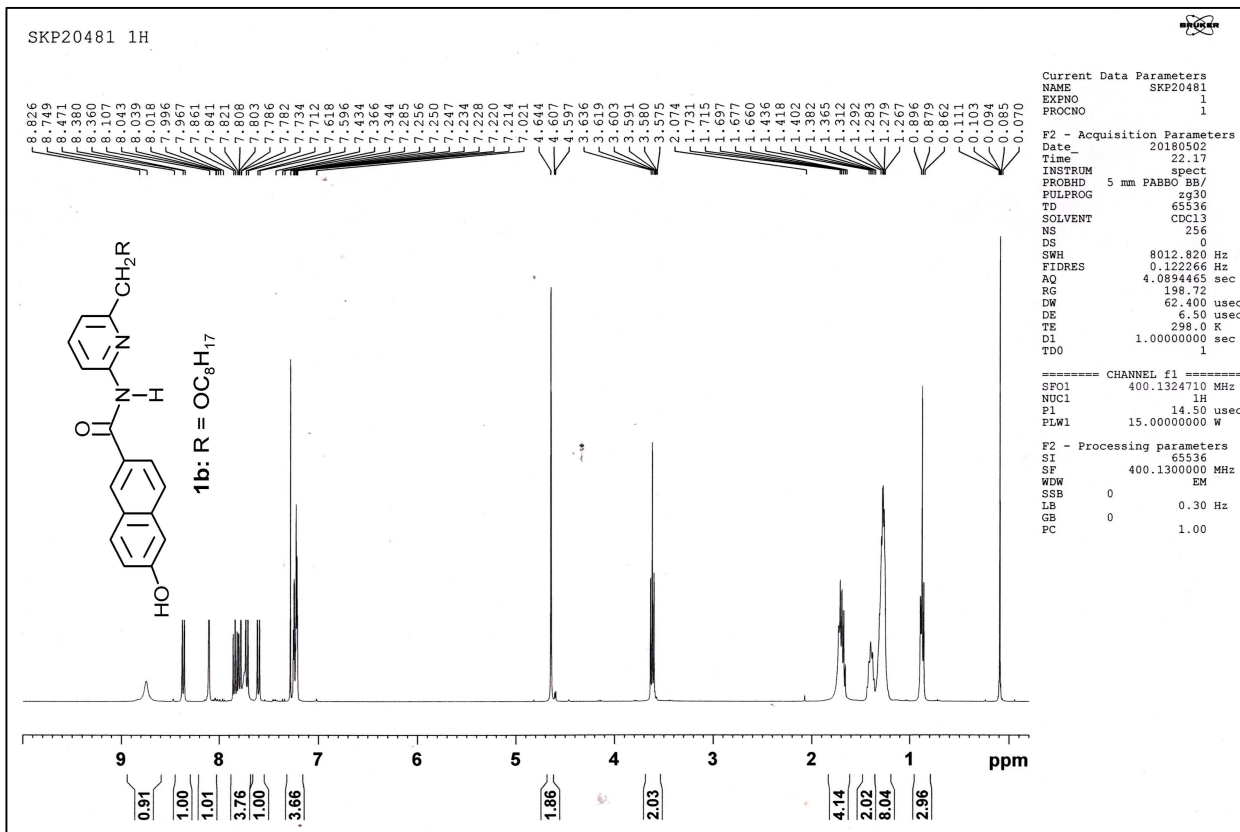

<sup>13</sup>C-NMR, CDCl<sub>3</sub> (100MHz)

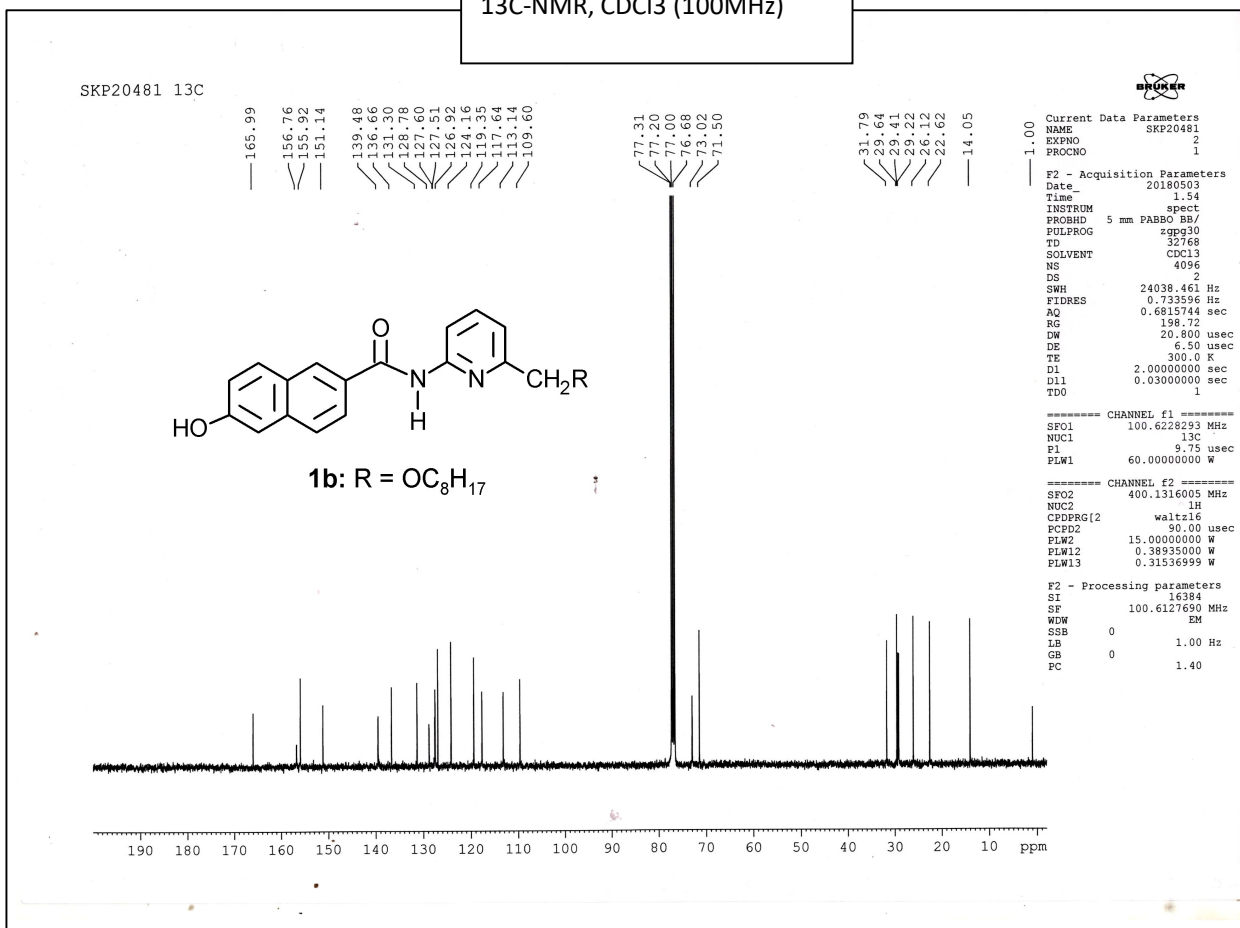

DEPT-90, CDCl<sub>3</sub> (100 MHz)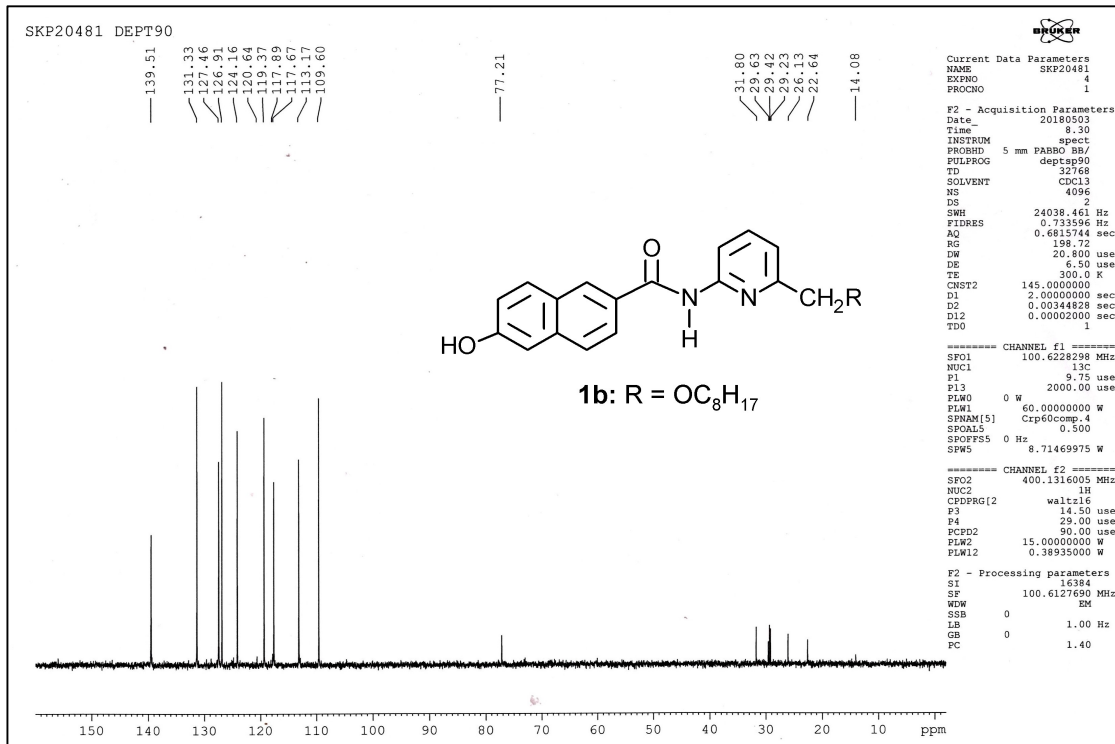DEPT-135, CDCl<sub>3</sub> (100 MHz)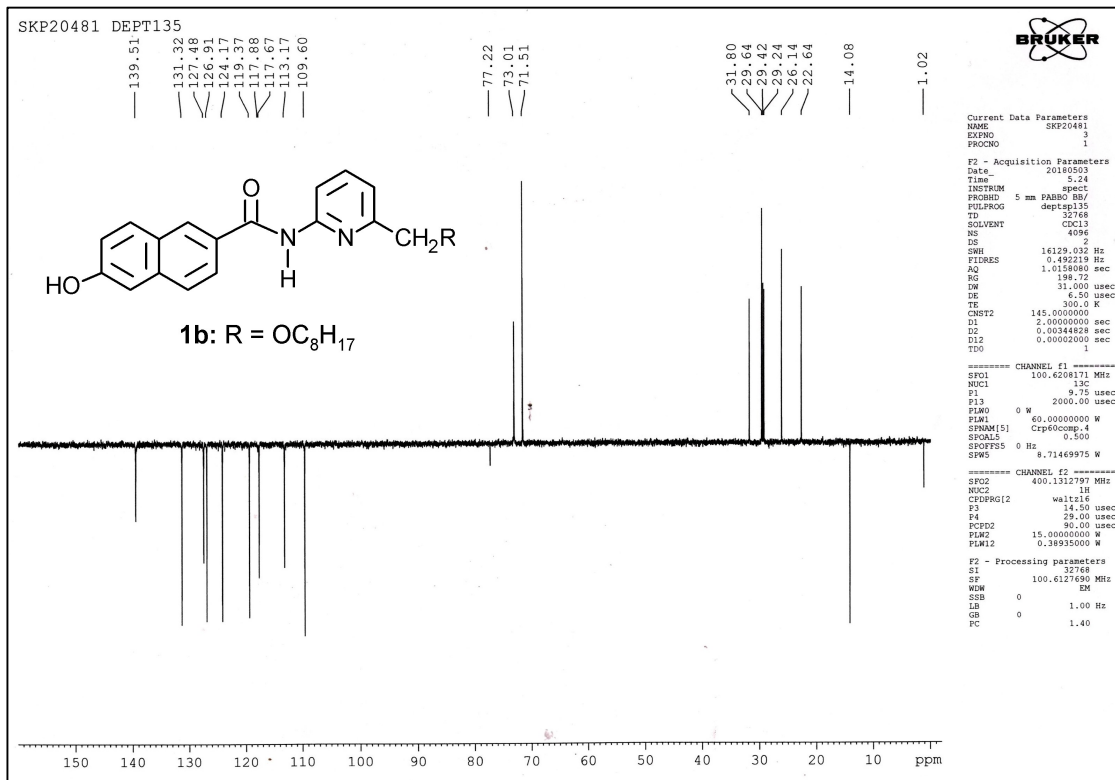

HRMS

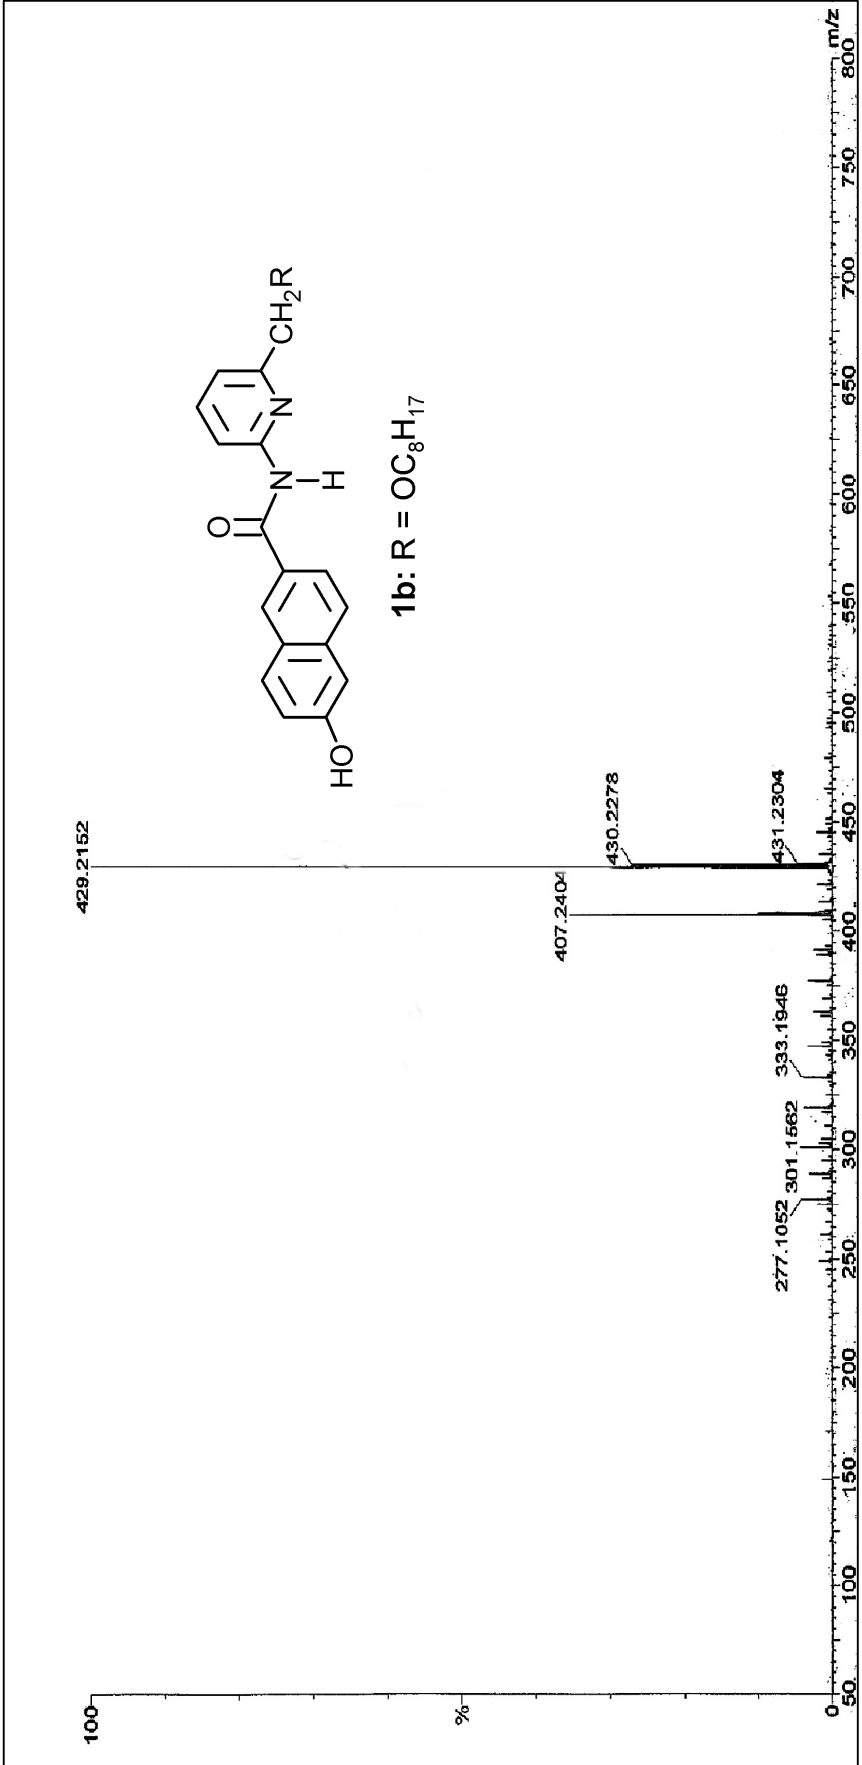

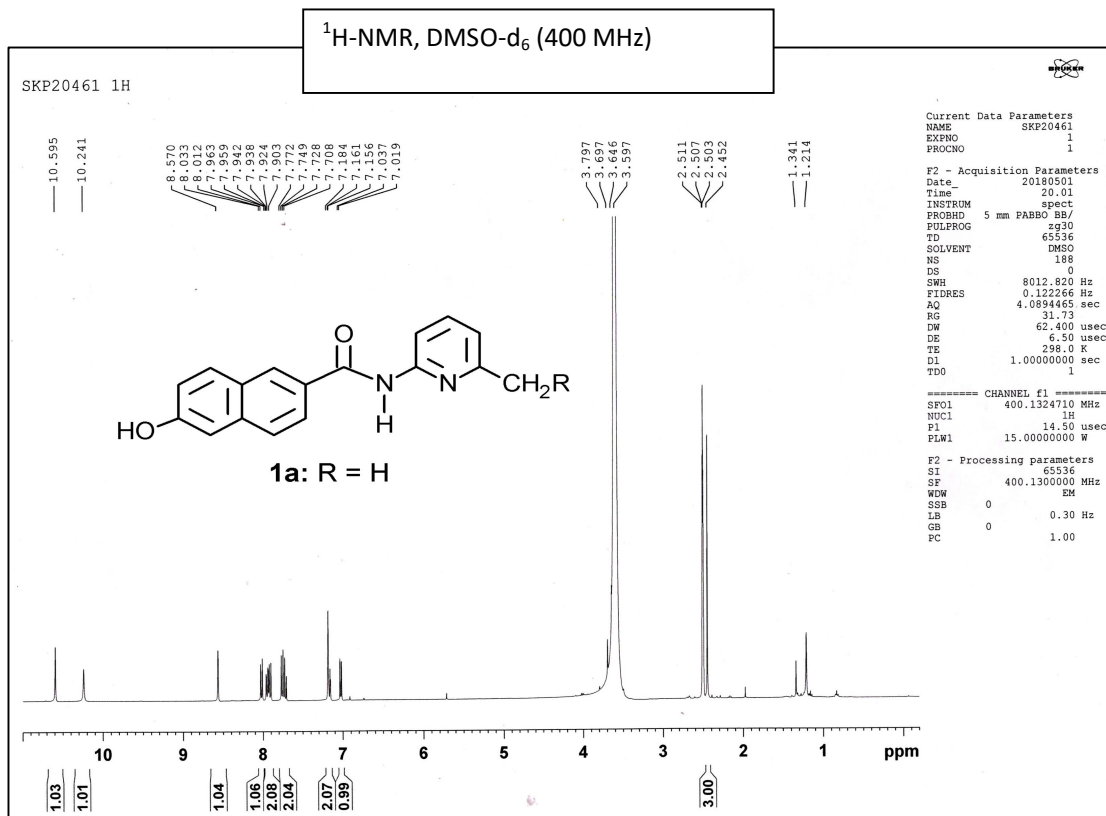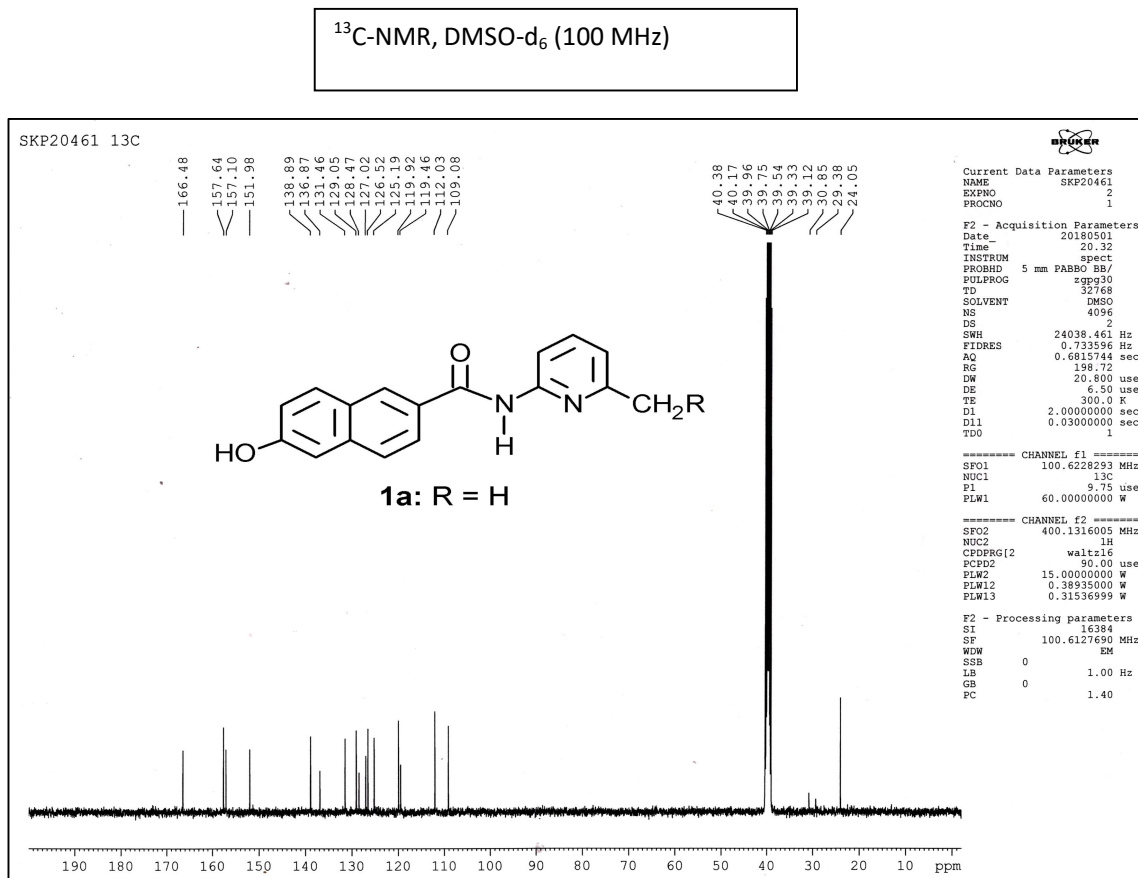

DEPT-90, DMSO-d<sub>6</sub>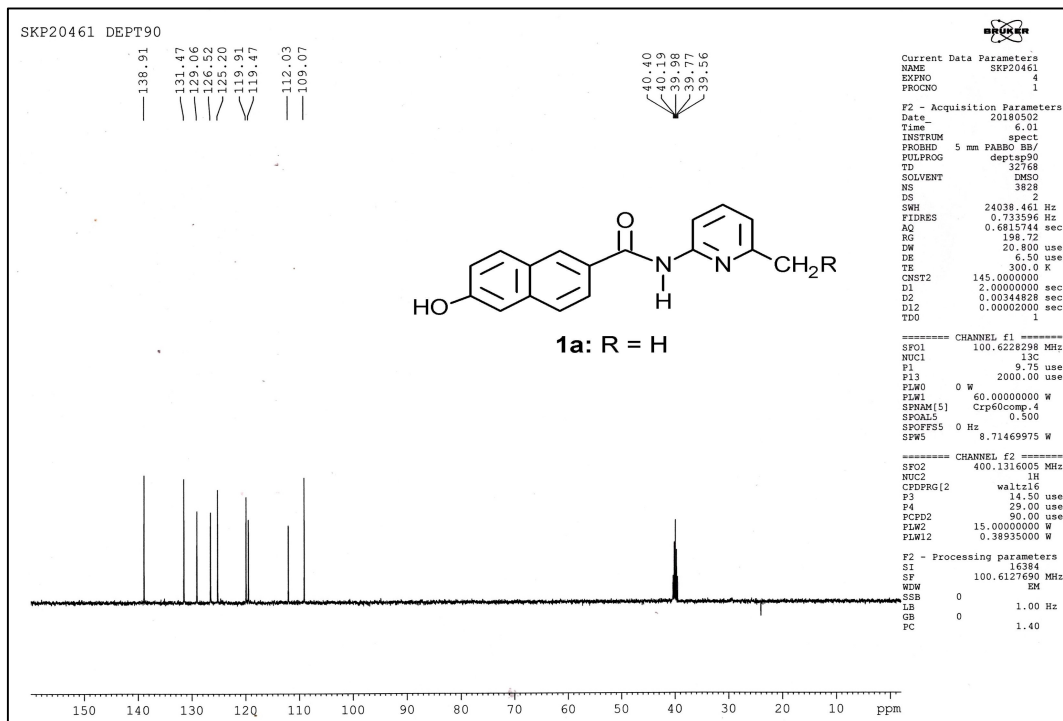DEPT-135, DMSO-d<sub>6</sub>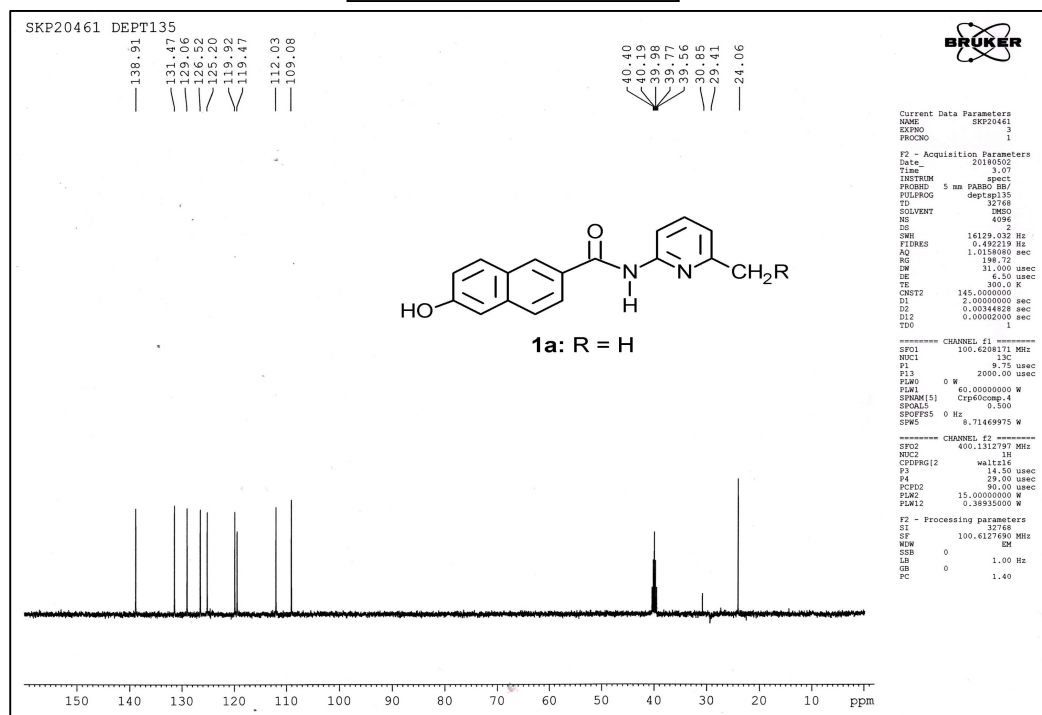



**HRMS**

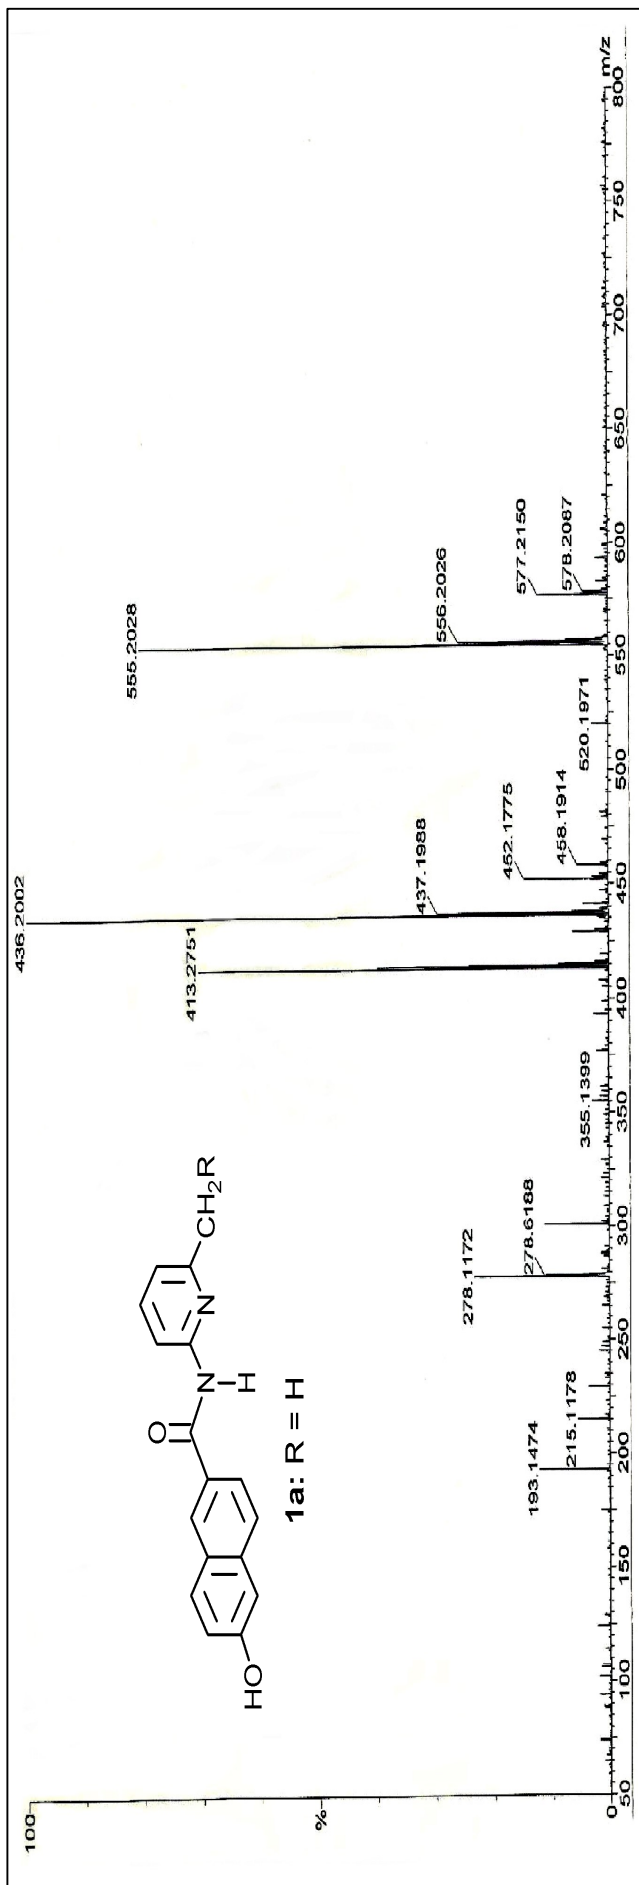

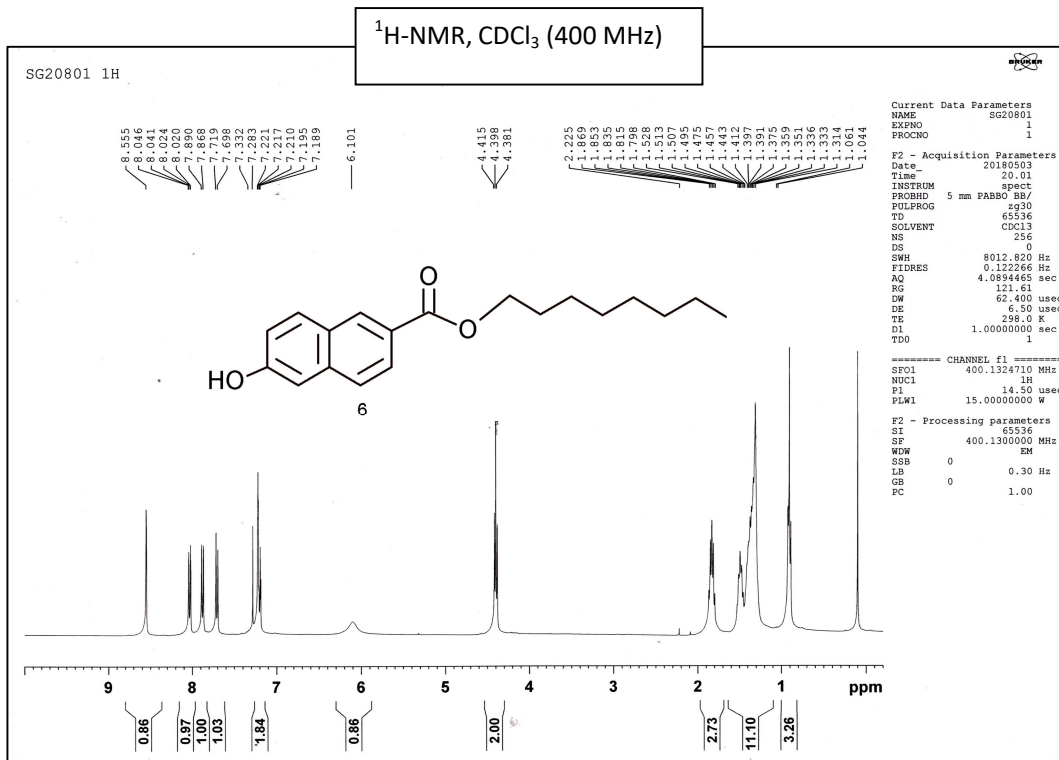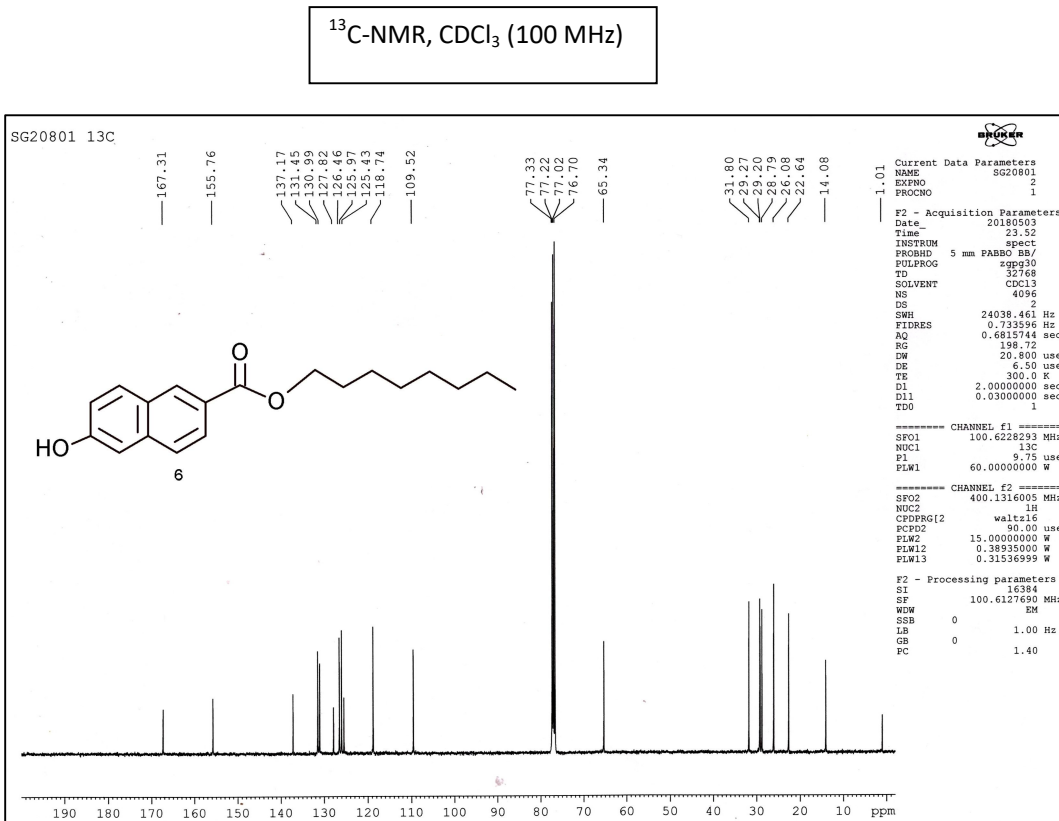

DEPT-90, CDCl<sub>3</sub> (400 MHz)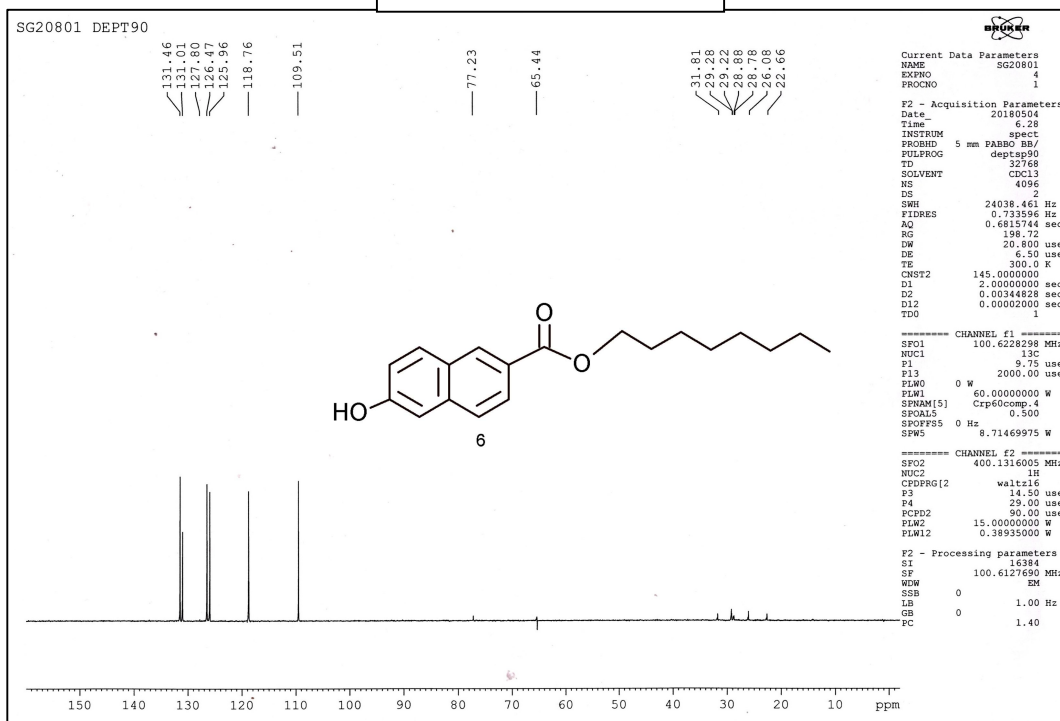DEPT-135, CDCl<sub>3</sub> (400 MHz)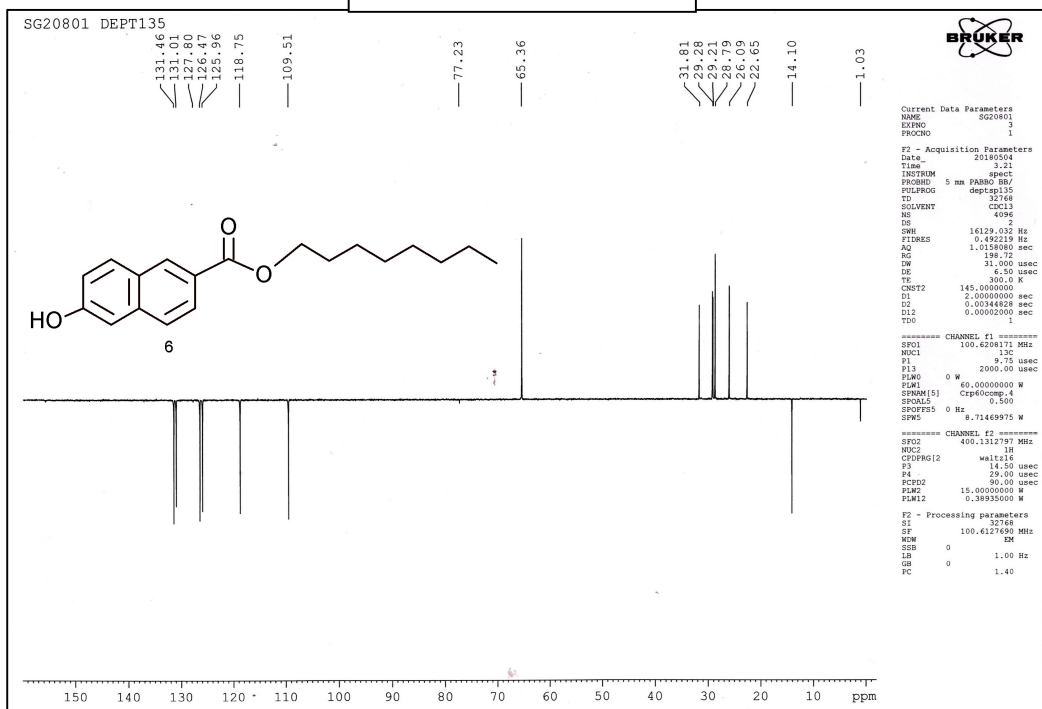

HRMS

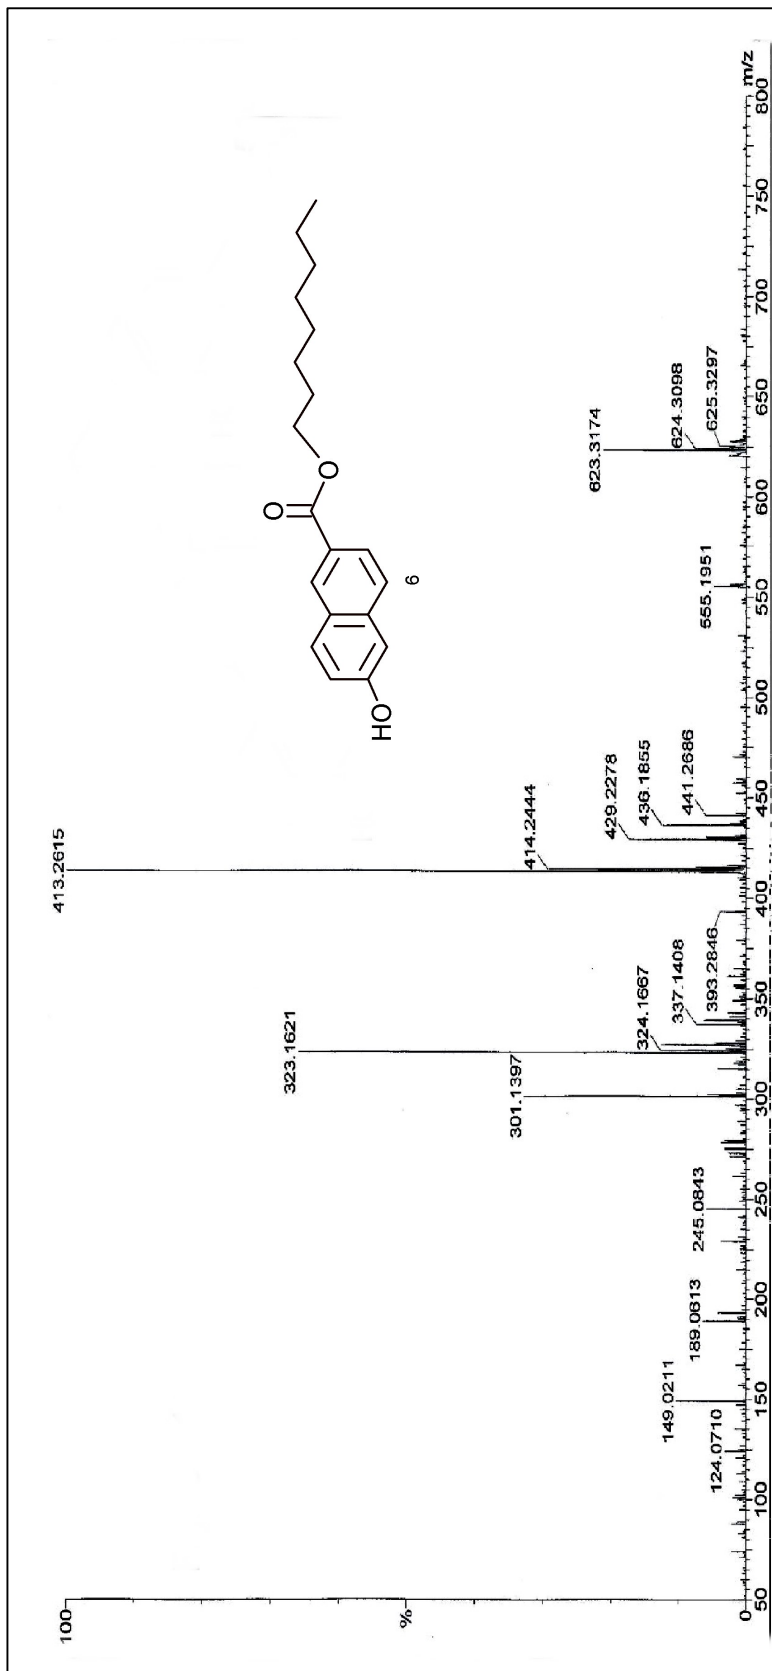

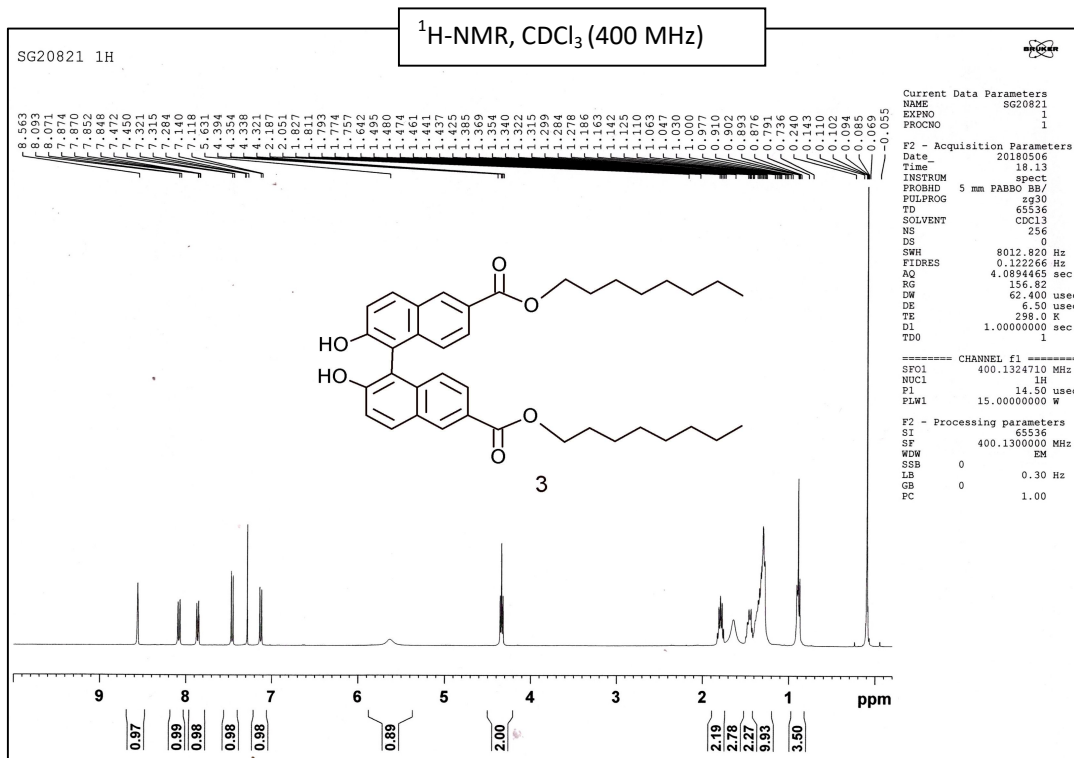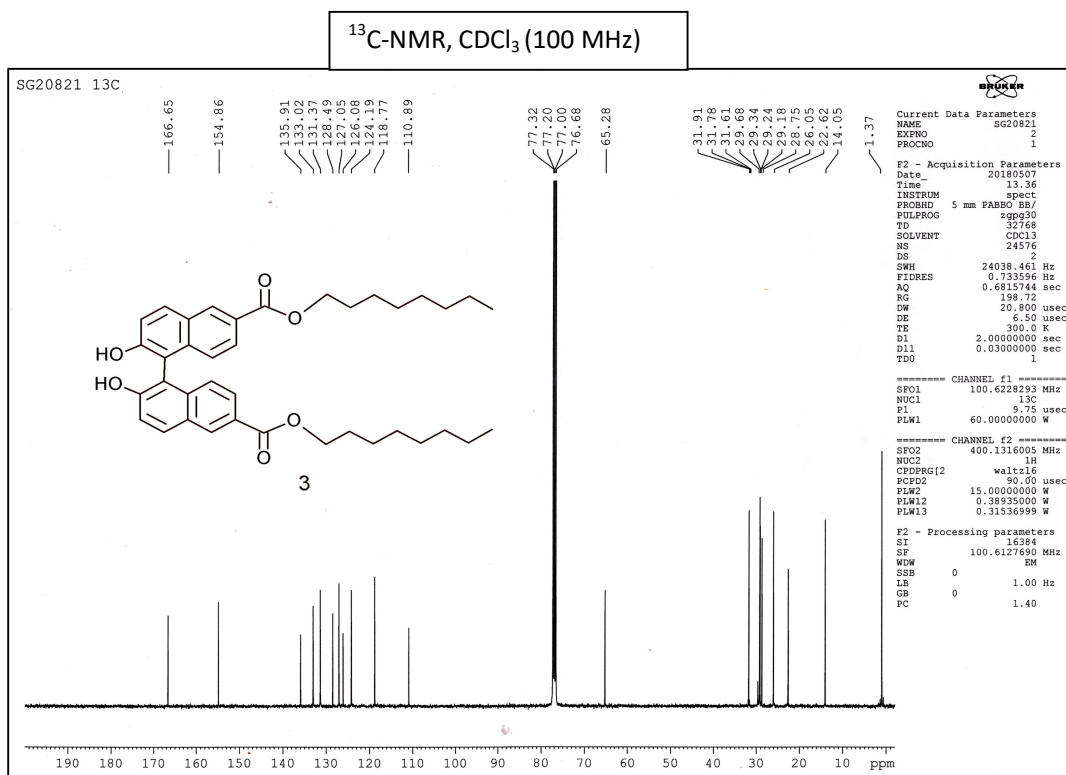

DEPT-90, CDCl<sub>3</sub> (100 MHz)

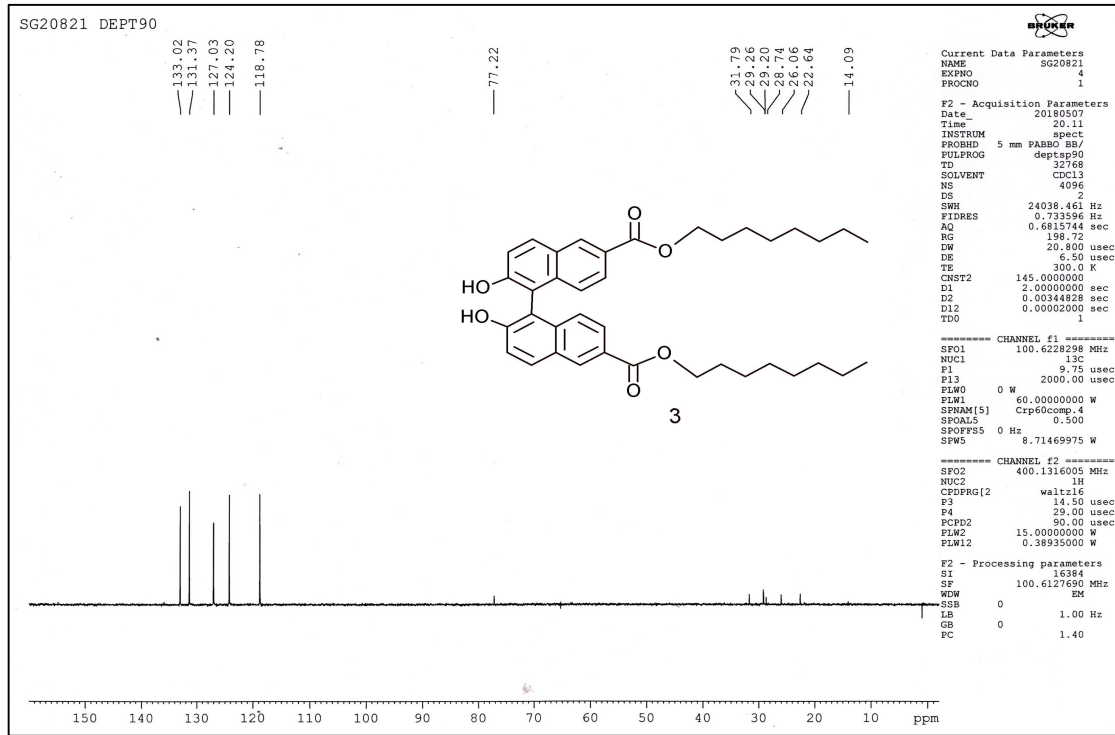

DEPT-135, CDCl<sub>3</sub> (100 MHz)

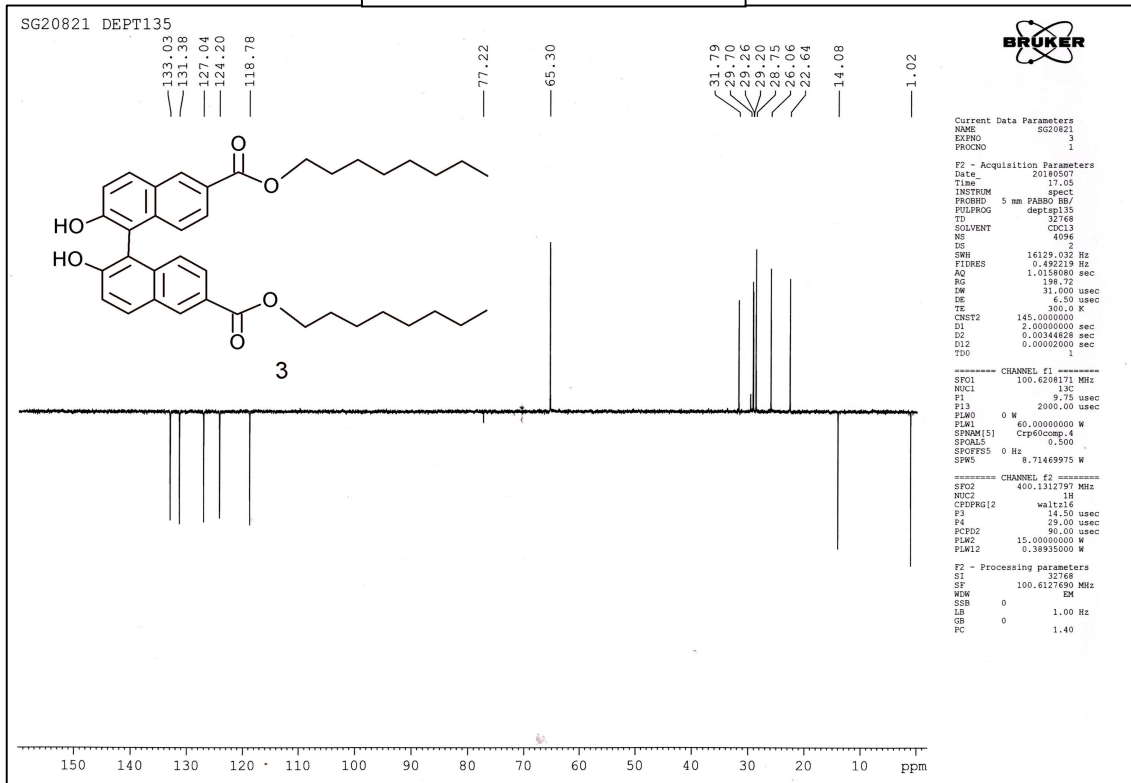

HRMS

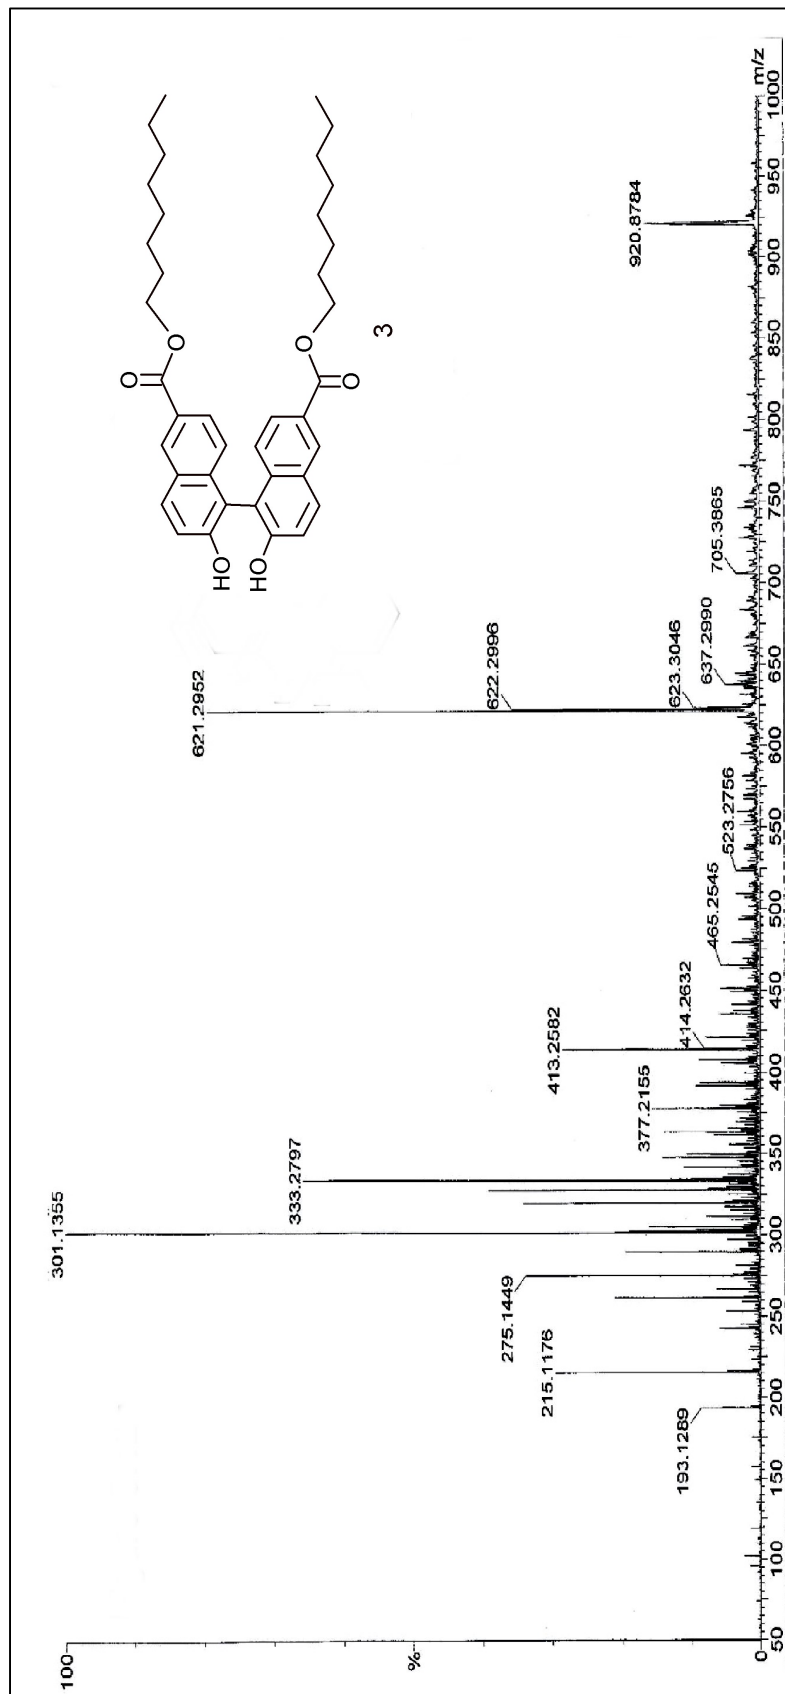

Supplement: RA-008-C8RA06488A-s001.pdf [file RA-008-C8RA06488A-s001.pdf]
